# Supplementary material for: The gut microbiota of tropical marine fish is largely uncultured and distinct from surrounding water microbiota
Source: Research Square preprint supplement (doi:10.21203/rs.3.rs-2703930/v1), 2023-03-21
Supplement: Supplementary file 1 [file 348b769cfc267558f6a8f755.docx]

**Supplementary**


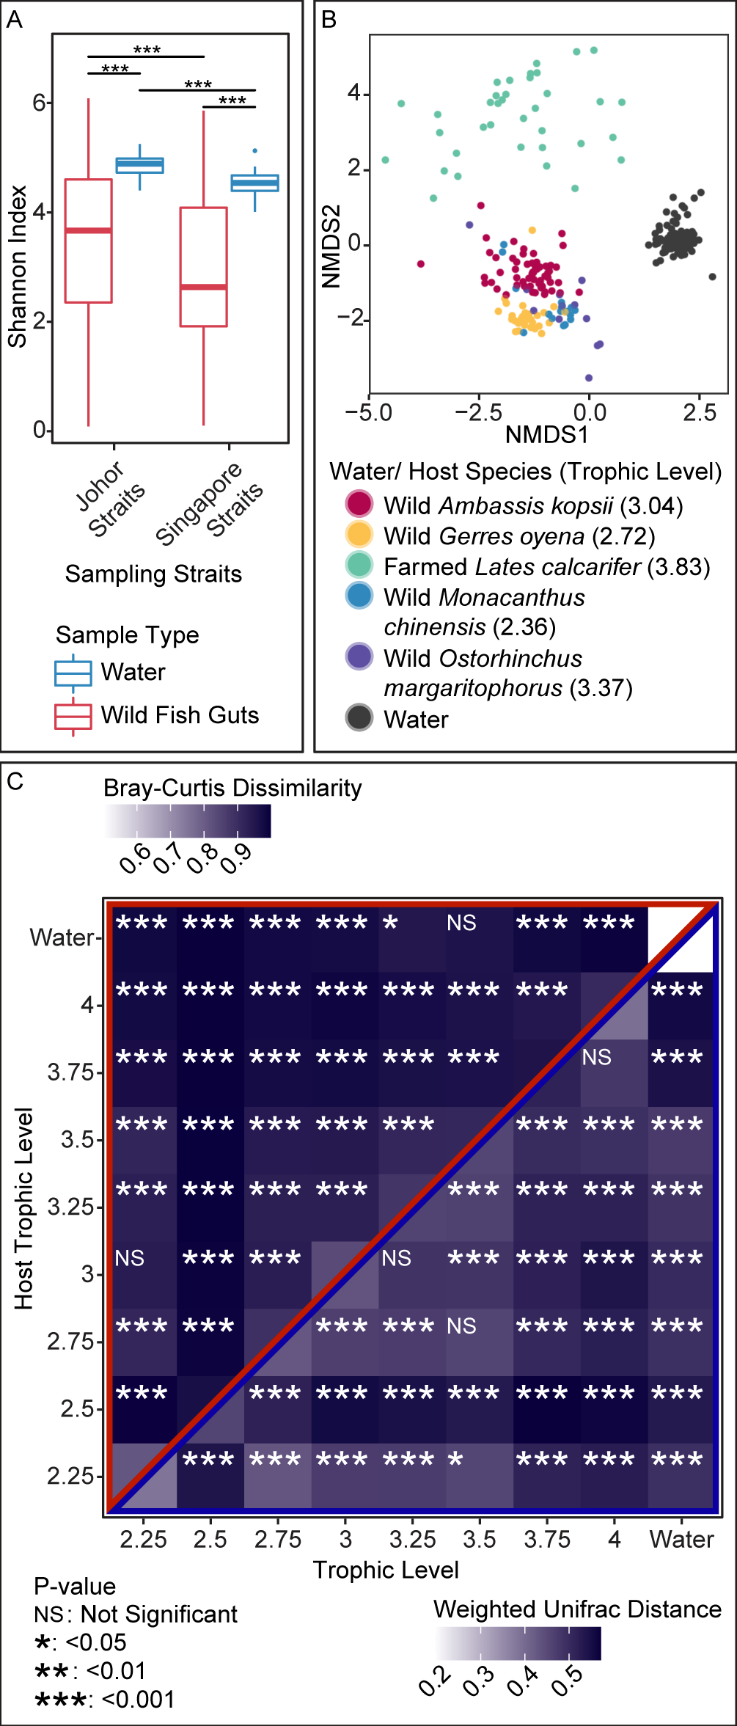


Figure S1: Differences in microbial diversity between gut and water samples. A) Boxplots indicating Shannon index of water and gut samples, grouped by sampling location. B) Samples were grouped according to host species and domestication status. The five largest groups, where host were identified to species level, and water samples were analysed with NMDS using Bray- Curtis distance. C) Heatmap showing difference in beta diversity between water and wild fish gut samples, where gut samples were grouped by host trophic level, rounded to nearest 0.25. Red triangle represents Bray- Curtis dissimilarity while blue triangle represents weighted Unifrac distance. Wilcoxon rank sum tests were performed within each distance matrix. Benjamini- Hochberg adjusted P-values obtained are indicated on the plot.


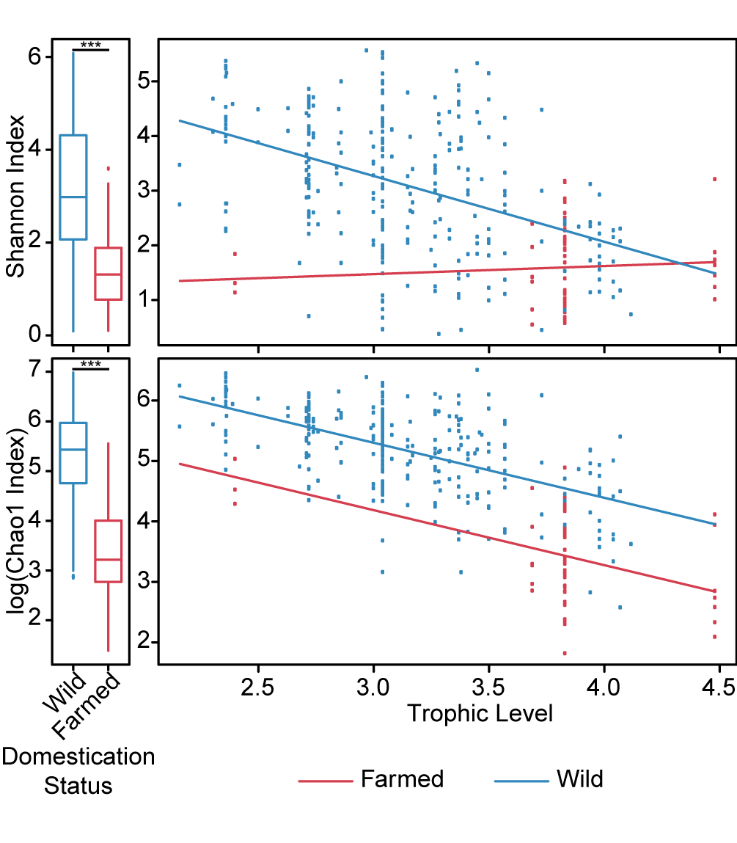


Figure S2: Alpha diversity indices of wild and farmed fish. Boxplots indicate Shannon index and Chao1 index calculated for fish grouped by domestication status. Boxplots were followed by scatter plots comparing host trophic level against the same alpha diversity indices. Points and lines represent samples and linear mixed effect (LME) models respectively. LMEs fit by REML are as follows: Shannon Index~ Trophic Level* Domestication Status+ (1| host species) + (1| Sampling Location) and log(Chao1 Index)~ Trophic Level+ Domestication Status+ (1| host species) + (1| Sampling Location). AIC values for Shannon index model is 1073.134, and that of Chao1 index model is 757.8932.


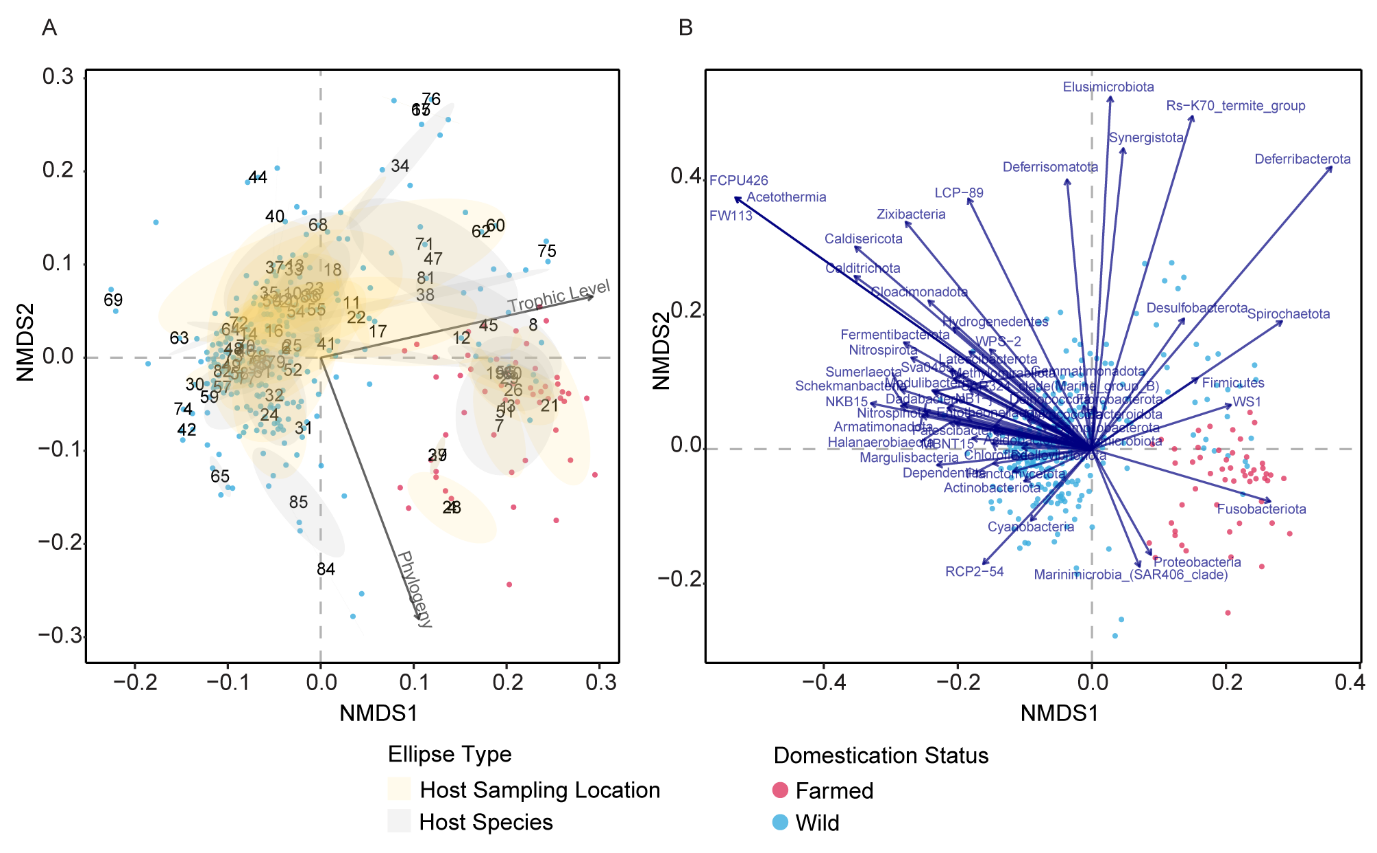


Figure S3: NMDS calculated based on Bray- Curtis dissimilarity. P-value for all centroids and arrows in these plots is 0.001. A) Each number represents one centroid, and ellipses indicate standard deviation from centroid. Each grey ellipse represents one host species, and each yellow ellipse represents one sampling location. Grey arrows indicate effect of two continuous variables. B) Blue arrows indicate effect of bacterial phyla found in the samples.

Tables:

Supplementary Table 1: Metadata of fish samples collected. Table includes site descriptions, host measurements, host taxonomy, and database derived host parameters.

Supplementary Table 2: Metadata of water samples collected. Table includes site location and habitat type.
