# Supplementary material for: The gut microbiota of tropical marine fish is largely uncultured and distinct from surrounding water microbiota
Source: Research Square preprint supplement (doi:10.21203/rs.3.rs-2703930/v1), 2023-03-21
Supplement: Supplementary file 2 [file 3a573addc91a0eaff3549ab5.xlsx]

## Sheet: Sheet1
id	Strait	Location	Sample Site	Maximum Depth Sampled	Substrate Type	Habitat Type
W.CHG01	Johor Strait	Changi Beach	site1	0.5	sandy	seagrass
W.CHG02	Johor Strait	Changi Beach	site2	0.5	sandy	seagrass
W.CHG03	Johor Strait	Changi Beach	site3	0.5	sandy	seagrass
W.CHG04	Johor Strait	Changi Beach	site1	1	sandy	seagrass
W.CHG05	Johor Strait	Changi Beach	site2	1	sandy	seagrass
W.CJS01	Johor Strait	Pulau Ubin Chek Jawa	site1	0.5	sandy	seagrass
W.CJS02	Johor Strait	Pulau Ubin Chek Jawa	site2	0.5	sandy	seagrass
W.CJS03	Johor Strait	Pulau Ubin Chek Jawa	site3	0.5	sandy	seagrass
W.CJS04	Johor Strait	Pulau Ubin Chek Jawa	site1	1	sandy	seagrass
W.CJS05	Johor Strait	Pulau Ubin Chek Jawa	site2	1.5	sandy	seagrass
W.CJS06	Johor Strait	Pulau Ubin Chek Jawa	site3	2	sandy	seagrass
W.CYR01	Singapore Strait	Cyrene reef	site1	0.5	sandy	seagrass
W.CYR02	Singapore Strait	Cyrene reef	site2	0.5	sandy	seagrass
W.CYR03	Singapore Strait	Cyrene reef	site3	0.5	sandy	seagrass
W.CYR04	Singapore Strait	Cyrene reef	site1	2	sandy	seagrass
W.CYR05	Singapore Strait	Cyrene reef	site2	1.7	sandy	seagrass
W.CYR06	Singapore Strait	Cyrene reef	site3	2.2	sandy	seagrass
W.JON01	Singapore Strait	Pulau Jong	site1	0.5	reef	reef
W.JON02	Singapore Strait	Pulau Jong	site2	0.5	reef	reef
W.JON03	Singapore Strait	Pulau Jong	site3	0.5	reef	reef
W.JON04	Singapore Strait	Pulau Jong	site1	1.2	reef	reef
W.JON05	Singapore Strait	Pulau Jong	site2	1.5	reef	reef
W.JON06	Singapore Strait	Pulau Jong	site3	2.5	reef	reef
W.LNR01	Singapore Strait	Labrador Nature Reserve	site1	1.5	sandy	seagrass
W.LNR02	Singapore Strait	Labrador Nature Reserve	site2	1	sandy	seagrass
W.LNR03	Singapore Strait	Labrador Nature Reserve	site3	1.5	sandy	seagrass
W.LNR04	Singapore Strait	Labrador Nature Reserve	site1	1.1	sandy	seagrass
W.LNR05	Singapore Strait	Labrador Nature Reserve	site2	1.4	sandy	seagrass
W.LNR06	Singapore Strait	Labrador Nature Reserve	site3	0.9	sandy	seagrass
W.OPC1-01	Singapore Strait	Open channel off Lazarus Island	site1	25	deepwater	open channel
W.OPC1-02	Singapore Strait	Open channel off Lazarus Island	site2	25	deepwater	open channel
W.OPC1-03	Singapore Strait	Open channel off Lazarus Island	site3	25	deepwater	open channel
W.OPC1-04	Singapore Strait	Open channel off Lazarus Island	site1	24	deepwater	open channel
W.OPC1-05	Singapore Strait	Open channel off Lazarus Island	site2	24	deepwater	open channel
W.OPC1-06	Singapore Strait	Open channel off Lazarus Island	site3	24	deepwater	open channel
W.OPC2-01	Singapore Strait	Open channel off Pulau Jong	site1	25	deepwater	open channel
W.OPC2-02	Singapore Strait	Open channel off Pulau Jong	site2	25	deepwater	open channel
W.OPC2-03	Singapore Strait	Open channel off Pulau Jong	site3	25	deepwater	open channel
W.OPC2-04	Singapore Strait	Open channel off Pulau Jong	site1	24	deepwater	open channel
W.OPC2-05	Singapore Strait	Open channel off Pulau Jong	site2	24	deepwater	open channel
W.OPC2-06	Singapore Strait	Open channel off Pulau Jong	site3	24	deepwater	open channel
W.OPC3-01	Singapore Strait	Open channel between Pengerang & Changi	site1	25	deepwater	open channel
W.OPC3-02	Singapore Strait	Open channel between Pengerang & Changi	site2	25	deepwater	open channel
W.OPC3-03	Singapore Strait	Open channel between Pengerang & Changi	site3	25	deepwater	open channel
W.OPC3-04	Singapore Strait	Open channel between Pengerang & Changi	site1	24	deepwater	open channel
W.OPC3-05	Singapore Strait	Open channel between Pengerang & Changi	site2	24	deepwater	open channel
W.OPC3-06	Singapore Strait	Open channel between Pengerang & Changi	site3	24	deepwater	open channel
W.OPC4-01	Singapore Strait	Open channel between Raffles Island & Pulau Semakau	site1	25	deepwater	open channel
W.OPC4-02	Singapore Strait	Open channel between Raffles Island & Pulau Semakau	site2	25	deepwater	open channel
W.OPC4-03	Singapore Strait	Open channel between Raffles Island & Pulau Semakau	site3	25	deepwater	open channel
W.OPC4-04	Singapore Strait	Open channel between Raffles Island & Pulau Semakau	site1	24	deepwater	open channel
W.OPC4-05	Singapore Strait	Open channel between Raffles Island & Pulau Semakau	site2	24	deepwater	open channel
W.OPC4-06	Singapore Strait	Open channel between Raffles Island & Pulau Semakau	site3	24	deepwater	open channel
W.PRP01	Johor Strait	Pasir Ris	site1	0	muddy	mangrove
W.PRP02	Johor Strait	Pasir Ris	site2	0	muddy	mangrove
W.PRP03	Johor Strait	Pasir Ris	site3	0	muddy	mangrove
W.PRP04	Johor Strait	Pasir Ris	site1	0	muddy	mangrove
W.PRP05	Johor Strait	Pasir Ris	site2	0	muddy	mangrove
W.SAT01	Singapore Strait	Pulau Satumu	site1	0.5	reef	reef
W.SAT02	Singapore Strait	Pulau Satumu	site2	0.5	reef	reef
W.SAT03	Singapore Strait	Pulau Satumu	site3	0.5	reef	reef
W.SAT04	Singapore Strait	Pulau Satumu	site1	1.5	reef	reef
W.SAT05	Singapore Strait	Pulau Satumu	site2	1.5	reef	reef
W.SAT06	Singapore Strait	Pulau Satumu	site3	1.8	reef	reef
W.SBWR01	Johor Strait	Sungei Buloh Wetland Reserve	site1	0.4	muddy	mangrove
W.SBWR02	Johor Strait	Sungei Buloh Wetland Reserve	site2	3	muddy	mangrove
W.SBWR03	Johor Strait	Sungei Buloh Wetland Reserve	site3	1.5	muddy	mangrove
W.SBWR04	Johor Strait	Sungei Buloh Wetland Reserve	site1	0.7	muddy	mangrove
W.SBWR05	Johor Strait	Sungei Buloh Wetland Reserve	site3	1.7	muddy	mangrove
W.SBWR06	Johor Strait	Sungei Buloh Wetland Reserve	site1	0.7	muddy	mangrove
W.SEMM01	Singapore Strait	Pulau Semakau	site1	0.5	sandy	mangrove
W.SEMM02	Singapore Strait	Pulau Semakau	site2	1	sandy	mangrove
W.SEMM03	Singapore Strait	Pulau Semakau	site3	1	sandy	mangrove
W.SEMM04	Singapore Strait	Pulau Semakau	site2	1.2	sandy	mangrove
W.SEMM05	Singapore Strait	Pulau Semakau	site3	1	sandy	mangrove
W.SEMM06	Singapore Strait	Pulau Semakau	site1	1	sandy	mangrove
W.SEMR01	Singapore Strait	Pulau Semakau	site1	0.5	reef	reef
W.SEMR02	Singapore Strait	Pulau Semakau	site2	0.5	reef	reef
W.SEMR03	Singapore Strait	Pulau Semakau	site3	0.5	reef	reef
W.SEMR04	Singapore Strait	Pulau Semakau	site3	4	reef	reef
W.SEMR05	Singapore Strait	Pulau Semakau	site1	3	reef	reef
W.SEMR06	Singapore Strait	Pulau Semakau	site2	5.5	reef	reef
W.SEMS01	Singapore Strait	Pulau Semakau	site1	2	sandy	seagrass
W.SEMS02	Singapore Strait	Pulau Semakau	site2	2	sandy	seagrass
W.SEMS03	Singapore Strait	Pulau Semakau	site3	2	sandy	seagrass
W.SEMS04	Singapore Strait	Pulau Semakau	site1	1.5	sandy	seagrass
W.SEMS05	Singapore Strait	Pulau Semakau	site2	1.4	sandy	seagrass
W.SEMS06	Singapore Strait	Pulau Semakau	site3	1.2	sandy	seagrass
W.SIMP01	Singapore Strait	Sisters' Islands	site1	0.5	reef	reef
W.SIMP02	Singapore Strait	Sisters' Islands	site2	1	reef	reef
W.SIMP03	Singapore Strait	Sisters' Islands	site3	1	reef	reef
W.SIMP04	Singapore Strait	Sisters' Islands	site1	3	reef	reef
W.SIMP05	Singapore Strait	Sisters' Islands	site2	3.5	reef	reef
W.SIMP06	Singapore Strait	Sisters' Islands	site3	4	reef	reef
W.UBIN01	Johor Strait	Pulau Ubin Sungei Jelutong	site1	0.5	sandy	mangrove
W.UBIN02	Johor Strait	Pulau Ubin Sungei Jelutong	site2	0.5	sandy	mangrove
W.UBIN03	Johor Strait	Pulau Ubin Sungei Jelutong	site3	0.5	sandy	mangrove
W.UBIN04	Johor Strait	Pulau Ubin Sungei Jelutong	site1	1.5	sandy	mangrove
W.UBIN05	Johor Strait	Pulau Ubin Sungei Jelutong	site2	1.2	sandy	mangrove
W.UBIN06	Johor Strait	Pulau Ubin Sungei Jelutong	site3	1.3	sandy	mangrove
