# Supplementary material for: The gut microbiota of tropical marine fish is largely uncultured and distinct from surrounding water microbiota
Source: Research Square preprint supplement (doi:10.21203/rs.3.rs-2703930/v1), 2023-03-21
Supplement: Supplementary file 3 [file ada382305e2b7bcfb2623100.xlsx]

## Sheet: fishes
	Sampling Details			Measured Host Details		Taxonomy						Host Details from Databases
id	Domestication Status	Strait	Site	Host Weight (g)	Host Standard Length (cm)	Order	Family	Subfamily	Genus	Binomial Name	Host Identified to Taxonomic Level	Trophic Level	Phylogenetic Distance	Feeding Path	Feeding Path Level	RepGuild1	RepGuild1 Level	RepGuild2	RepGuild2 Level	Mean Aspect Ratio
F0002	wild	Johor Strait	Changi Beach	NA	1.7	Acanthuriformes	Leiognathidae	Leiognathinae	Leiognathus	Leiognathus ruconius	species	2.71	0.26	pelagic	species	nonguarders	species	egg scatterers	species	2.575
F0003	wild	Johor Strait	Changi Beach	NA	3.8	Eupercaria/misc	Sillaginidae		Sillago	Sillago sp	genus	3.28	0.26	benthic	genus	nonguarders	genus	egg scatterers	genus	NA
F0004	wild	Johor Strait	Changi Beach	NA	3.5	Eupercaria/misc	Sillaginidae		Sillago	Sillago sp	genus	3.28	0.26	benthic	genus	nonguarders	genus	egg scatterers	genus	NA
F0005	wild	Johor Strait	Changi Beach	NA	3.5	Eupercaria/misc	Sillaginidae		Sillago	Sillago sp	genus	3.28	0.26	benthic	genus	nonguarders	genus	egg scatterers	genus	NA
F0006	wild	Johor Strait	Changi Beach	NA	3.6	Eupercaria/misc	Sillaginidae		Sillago	Sillago sp	genus	3.28	0.26	benthic	genus	nonguarders	genus	egg scatterers	genus	NA
F0007	wild	Johor Strait	Changi Beach	NA	3.7	Tetraodontiformes	Monacanthidae		Monacanthus	Monacanthus chinensis	species	2.36	0.24	benthic	genus	guarders	species	nesters	species	2.71491
F0009	wild	Johor Strait	Changi Beach	NA	2.9	Tetraodontiformes	Monacanthidae		Monacanthus	Monacanthus chinensis	species	2.36	0.24	benthic	genus	guarders	species	nesters	species	2.71491
F0010	wild	Johor Strait	Changi Beach	NA	1.9	Tetraodontiformes	Monacanthidae		Monacanthus	Monacanthus sp	genus	2.36	0.25	benthic	genus	guarders	genus	nesters	genus	NA
F0011	wild	Johor Strait	Changi Beach	NA	3	Tetraodontiformes	Triacanthidae		Tripodichthys	Tripodichthys blochii	species	3.5	0.26	benthic	species	nonguarders	close relative	egg scatterers	close relative	2.99822
F0012	wild	Johor Strait	Changi Beach	NA	2.5	Tetraodontiformes	Monacanthidae		Monacanthus	Monacanthus chinensis	species	2.36	0.24	benthic	genus	guarders	species	nesters	species	2.71491
F0013	wild	Johor Strait	Changi Beach	NA	3	Tetraodontiformes	Monacanthidae		Monacanthus	Monacanthus chinensis	species	2.36	0.24	benthic	genus	guarders	species	nesters	species	2.71491
F0014	wild	Johor Strait	Changi Beach	NA	3.3	Tetraodontiformes	Monacanthidae		Monacanthus	Monacanthus chinensis	species	2.36	0.24	benthic	genus	guarders	species	nesters	species	2.71491
F0015	wild	Johor Strait	Changi Beach	NA	3.9	Tetraodontiformes	Monacanthidae		Monacanthus	Monacanthus chinensis	species	2.36	0.24	benthic	genus	guarders	species	nesters	species	2.71491
F0016	wild	Johor Strait	Changi Beach	NA	3.6	Tetraodontiformes	Monacanthidae		Monacanthus	Monacanthus chinensis	species	2.36	0.24	benthic	genus	guarders	species	nesters	species	2.71491
F0017	wild	Johor Strait	Changi Beach	NA	3.9	Tetraodontiformes	Monacanthidae		Monacanthus	Monacanthus chinensis	species	2.36	0.24	benthic	genus	guarders	species	nesters	species	2.71491
F0018	wild	Johor Strait	Changi Beach	NA	4.3	Tetraodontiformes	Monacanthidae		Monacanthus	Monacanthus chinensis	species	2.36	0.24	benthic	genus	guarders	species	nesters	species	2.71491
F0020	wild	Johor Strait	Changi Beach	NA	1.7	Acanthuriformes	Leiognathidae	Leiognathinae	Leiognathus	Leiognathus ruconius	species	2.71	0.26	pelagic	species	nonguarders	species	egg scatterers	species	2.575
F0021	wild	Johor Strait	Changi Beach	NA	5.4	Clupeiformes	Engraulidae	Engraulinae	Stolephorus	Stolephorus indicus	species	3.33	0.27	benthic	species	nonguarders	species	egg scatterers	species	1.68095
F0022	wild	Johor Strait	Changi Beach	NA	5.5	Clupeiformes	Engraulidae	Engraulinae	Stolephorus	Stolephorus indicus	species	3.33	0.27	benthic	species	nonguarders	species	egg scatterers	species	1.68095
F0024	wild	Johor Strait	Changi Beach	NA	1.7	Acanthuriformes	Leiognathidae	Leiognathinae	Leiognathus	Leiognathus ruconius	species	2.71	0.26	pelagic	species	nonguarders	species	egg scatterers	species	2.575
F0025	wild	Johor Strait	Changi Beach	NA	1.7	Acanthuriformes	Leiognathidae	Leiognathinae	Leiognathus	Leiognathus ruconius	species	2.71	0.26	pelagic	species	nonguarders	species	egg scatterers	species	2.575
F0026	wild	Johor Strait	Changi Beach	NA	1.7	Acanthuriformes	Leiognathidae	Leiognathinae	Leiognathus	Leiognathus ruconius	species	2.71	0.26	pelagic	species	nonguarders	species	egg scatterers	species	2.575
F0027	wild	Johor Strait	Changi Beach	NA	1.8	Acanthuriformes	Leiognathidae	Leiognathinae	Leiognathus	Leiognathus ruconius	species	2.71	0.26	pelagic	species	nonguarders	species	egg scatterers	species	2.575
F0028	wild	Johor Strait	Changi Beach	NA	1.8	Acanthuriformes	Leiognathidae	Leiognathinae	Leiognathus	Leiognathus ruconius	species	2.71	0.26	pelagic	species	nonguarders	species	egg scatterers	species	2.575
F0029	wild	Johor Strait	Changi Beach	NA	6.4	Clupeiformes	Clupeidae	Dorosomatinae	Sardinella	Sardinella sp	genus	2.84	0.26	pelagic	genus	nonguarders	genus	egg scatterers	genus	NA
F0030	wild	Johor Strait	Changi Beach	NA	6.3	Clupeiformes	Clupeidae	Dorosomatinae	Sardinella	Sardinella sp	genus	2.84	0.26	pelagic	genus	nonguarders	genus	egg scatterers	genus	NA
F0031	wild	Johor Strait	Changi Beach	NA	7.5	Clupeiformes	Clupeidae	Dorosomatinae	Escualosa	Escualosa thoracata	species	3.16	0.26	pelagic	species	nonguarders	species	egg scatterers	species	2.19764
F0032	wild	Johor Strait	Changi Beach	NA	7.4	Clupeiformes	Clupeidae	Dorosomatinae	Escualosa	Escualosa thoracata	species	3.16	0.26	pelagic	species	nonguarders	species	egg scatterers	species	2.19764
F0033	wild	Johor Strait	Changi Beach	NA	1.7	Acanthuriformes	Leiognathidae	Leiognathinae	Leiognathus	Leiognathus ruconius	species	2.71	0.26	pelagic	species	nonguarders	species	egg scatterers	species	2.575
F0034	wild	Johor Strait	Changi Beach	NA	3.5	Tetraodontiformes	Monacanthidae		Monacanthus	Monacanthus sp	genus	2.36	0.25	benthic	genus	guarders	genus	nesters	genus	NA
F0036	wild	Johor Strait	Changi Beach	NA	4.2	Clupeiformes	Clupeidae	Dorosomatinae	Escualosa	Escualosa thoracata	species	3.16	0.26	pelagic	species	nonguarders	species	egg scatterers	species	2.19764
F0038	wild	Johor Strait	Changi Beach	NA	7.3	Clupeiformes	Clupeidae	Dorosomatinae	Herklotsichthys	Herklotsichthys dispilonotus	species	3.08	0.25	pelagic	genus	nonguarders	genus	egg scatterers	genus	1.55298
F0039	wild	Johor Strait	Changi Beach	NA	7.3	Clupeiformes	Clupeidae	Dorosomatinae	Herklotsichthys	Herklotsichthys dispilonotus	species	3.08	0.25	pelagic	genus	nonguarders	genus	egg scatterers	genus	1.55298
F0040	wild	Johor Strait	Changi Beach	NA	6.9	Clupeiformes	Clupeidae	Dorosomatinae	Herklotsichthys	Herklotsichthys dispilonotus	species	3.08	0.25	pelagic	genus	nonguarders	genus	egg scatterers	genus	1.55298
F0041	wild	Johor Strait	Changi Beach	NA	16	Acanthuriformes	Scatophagidae		Scatophagus	Scatophagus argus	species	2.99	0.26	benthic	species	nonguarders	species	egg scatterers	species	2.3346
F0042	wild	Johor Strait	Changi Beach	NA	10.5	Siluriformes	Plotosidae		Plotosus	Plotosus lineatus	species	3.57	0.29	benthic	species	guarders	species	nesters	species	NA
F0043	wild	Johor Strait	Changi Beach	NA	15	Siluriformes	Plotosidae		Plotosus	Plotosus lineatus	species	3.57	0.29	benthic	species	guarders	species	nesters	species	NA
F0044	wild	Johor Strait	Changi Beach	NA	14.5	Siluriformes	Plotosidae		Plotosus	Plotosus lineatus	species	3.57	0.29	benthic	species	guarders	species	nesters	species	NA
F0045	wild	Johor Strait	Changi Beach	NA	15	Siluriformes	Plotosidae		Plotosus	Plotosus lineatus	species	3.57	0.29	benthic	species	guarders	species	nesters	species	NA
F0046	wild	Johor Strait	Changi Beach	NA	15.5	Siluriformes	Plotosidae		Plotosus	Plotosus lineatus	species	3.57	0.29	benthic	species	guarders	species	nesters	species	NA
F0047	wild	Johor Strait	Changi Beach	NA	4.9	Tetraodontiformes	Monacanthidae		Monacanthus	Monacanthus chinensis	species	2.36	0.24	benthic	genus	guarders	species	nesters	species	2.71491
F0048	wild	Singapore Strait	Pulau Semakau	NA	8	Beloniformes	Zenarchopteridae		Zenarchopterus	Zenarchopterus gilli	species	2.86	0.28	benthic	genus	bearers	species	internal live bearers	species	0.829238
F0049	wild	Singapore Strait	Pulau Semakau	NA	8	Beloniformes	Zenarchopteridae		Zenarchopterus	Zenarchopterus gilli	species	2.86	0.28	benthic	genus	bearers	species	internal live bearers	species	0.829238
F0051	wild	Singapore Strait	Pulau Semakau	NA	6	Tetraodontiformes	Monacanthidae		Acreichthys	Acreichthys tomentosus	species	2.97	0.26	benthic	species	nonguarders	species	egg scatterers	species	1.35671
F0052	wild	Singapore Strait	Pulau Semakau	NA	6	Eupercaria/misc	Gerreidae		Gerres	Gerres oyena	species	2.72	0.22	benthic	species	nonguarders	genus	egg scatterers	genus	2.07405
F0056	wild	Singapore Strait	Pulau Semakau	NA	4.2	Kurtiformes	Apogonidae	Apogoninae	Ostorhinchus	Ostorhinchus margaritophorus	species	3.37	0.27	benthic	genus	bearers	species	external brooders	species	1.43237
F0057	wild	Singapore Strait	East Coast park	NA	2.5	Acanthuriformes	Leiognathidae	Gazzinae	Deveximentum	Deveximentum hanedai	species	3	0.26	pelagic	genus	nonguarders	genus	egg scatterers	genus	NA
F0058	wild	Singapore Strait	East Coast park	NA	2.5	Acanthuriformes	Leiognathidae	Gazzinae	Deveximentum	Deveximentum hanedai	species	3	0.26	pelagic	genus	nonguarders	genus	egg scatterers	genus	NA
F0060	wild	Singapore Strait	East Coast park	NA	2.6	Acanthuriformes	Leiognathidae	Gazzinae	Deveximentum	Deveximentum hanedai	species	3	0.26	pelagic	genus	nonguarders	genus	egg scatterers	genus	NA
F0062	wild	Singapore Strait	East Coast park	NA	2.2	Acanthuriformes	Leiognathidae	Gazzinae	Deveximentum	Deveximentum hanedai	species	3	0.26	pelagic	genus	nonguarders	genus	egg scatterers	genus	NA
F0063	wild	Singapore Strait	East Coast park	NA	2.9	Acanthuriformes	Leiognathidae	Gazzinae	Deveximentum	Deveximentum hanedai	species	3	0.26	pelagic	genus	nonguarders	genus	egg scatterers	genus	NA
F0083	wild	Singapore Strait	East Coast park	NA	24	Scombriformes	Trichiuridae	Trichiurinae	Trichiurus	Trichiurus sp	genus	4.12	0.29	pelagic	genus	nonguarders	genus	egg scatterers	genus	NA
F0085	wild	Singapore Strait	East Coast park	NA	5.1	Eupercaria/misc	Haemulidae	Haemulinae	Pomadasys	Pomadasys argenteus	species	3.47	0.25	benthic	species	nonguarders	species	egg scatterers	species	1.73395
F0086	wild	Singapore Strait	East Coast park	NA	5.6	Kurtiformes	Apogonidae	Apogoninae	Archamia	Archamia bleekeri	species	3.73	0.24	pelagic	species	bearers	species	external brooders	species	1.49271
F0087	wild	Singapore Strait	East Coast park	NA	4.9	Kurtiformes	Apogonidae	Apogoninae	Archamia	Archamia bleekeri	species	3.73	0.24	pelagic	species	bearers	species	external brooders	species	1.49271
F0090	wild	Singapore Strait	East Coast park	NA	5.7	Kurtiformes	Apogonidae	Apogoninae	Archamia	Archamia bleekeri	species	3.73	0.24	pelagic	species	bearers	species	external brooders	species	1.49271
F0091	wild	Singapore Strait	East Coast park	NA	5.5	Kurtiformes	Apogonidae	Apogoninae	Archamia	Archamia bleekeri	species	3.73	0.24	pelagic	species	bearers	species	external brooders	species	1.49271
F0092	wild	Singapore Strait	Pulau Semakau	NA	2.3	Beloniformes	Adrianichthyidae	Oryziinae	Oryzias	Oryzias javanicus	species	3.36	0.26	benthic	species	bearers	species	external brooders	species	0.865448
F0096	wild	Singapore Strait	East Coast park	NA	2.5	Acanthuriformes	Leiognathidae	Gazzinae	Deveximentum	Deveximentum hanedai	species	3	0.26	pelagic	genus	nonguarders	genus	egg scatterers	genus	NA
F0100	wild	Singapore Strait	East Coast park	NA	2.4	Acanthuriformes	Leiognathidae	Gazzinae	Deveximentum	Deveximentum hanedai	species	3	0.26	pelagic	genus	nonguarders	genus	egg scatterers	genus	NA
F0101	wild	Singapore Strait	East Coast park	NA	2.3	Acanthuriformes	Leiognathidae	Gazzinae	Deveximentum	Deveximentum hanedai	species	3	0.26	pelagic	genus	nonguarders	genus	egg scatterers	genus	NA
F0102	wild	Singapore Strait	East Coast park	NA	2.6	Acanthuriformes	Leiognathidae	Gazzinae	Deveximentum	Deveximentum hanedai	species	3	0.26	pelagic	genus	nonguarders	genus	egg scatterers	genus	NA
F0103	wild	Singapore Strait	East Coast park	NA	2.6	Acanthuriformes	Leiognathidae	Gazzinae	Deveximentum	Deveximentum hanedai	species	3	0.26	pelagic	genus	nonguarders	genus	egg scatterers	genus	NA
F0104	wild	Singapore Strait	St Johns Island	NA	2	Atheriniformes	Atherinidae	Atherinomorinae	Atherinomorus	Atherinomorus sp	genus	3.27	0.24	benthic	genus	nonguarders	subfamily	egg scatterers	subfamily	NA
F0106	wild	Singapore Strait	St Johns Island	NA	4	Atheriniformes	Atherinidae	Atherinomorinae	Atherinomorus	Atherinomorus sp	genus	3.27	0.24	benthic	genus	nonguarders	subfamily	egg scatterers	subfamily	NA
F0107	wild	Singapore Strait	St Johns Island	NA	2.5	Atheriniformes	Atherinidae	Atherinomorinae	Atherinomorus	Atherinomorus sp	genus	3.27	0.24	benthic	genus	nonguarders	subfamily	egg scatterers	subfamily	NA
F0109	wild	Singapore Strait	St Johns Island	NA	4	Atheriniformes	Atherinidae	Atherinomorinae	Atherinomorus	Atherinomorus sp	genus	3.27	0.24	benthic	genus	nonguarders	subfamily	egg scatterers	subfamily	NA
F0117	wild	Singapore Strait	St Johns Island	NA	3.5	Atheriniformes	Atherinidae	Atherinomorinae	Atherinomorus	Atherinomorus sp	genus	3.27	0.24	benthic	genus	nonguarders	subfamily	egg scatterers	subfamily	NA
F0119	wild	Singapore Strait	St Johns Island	NA	5	Atheriniformes	Atherinidae	Atherinomorinae	Atherinomorus	Atherinomorus sp	genus	3.27	0.24	benthic	genus	nonguarders	subfamily	egg scatterers	subfamily	NA
F0122	wild	Singapore Strait	St Johns Island	NA	4	Atheriniformes	Atherinidae	Atherinomorinae	Atherinomorus	Atherinomorus sp	genus	3.27	0.24	benthic	genus	nonguarders	subfamily	egg scatterers	subfamily	NA
F0123	wild	Singapore Strait	St Johns Island	NA	1.6	Eupercaria/misc	Gerreidae		Gerres	Gerres oyena	species	2.72	0.22	benthic	species	nonguarders	genus	egg scatterers	genus	2.07405
F0126	wild	Singapore Strait	St Johns Island	NA	3.3	Eupercaria/misc	Gerreidae		Gerres	Gerres oyena	species	2.72	0.22	benthic	species	nonguarders	genus	egg scatterers	genus	2.07405
F0128	wild	Singapore Strait	St Johns Island	NA	2.5	Eupercaria/misc	Gerreidae		Gerres	Gerres oyena	species	2.72	0.22	benthic	species	nonguarders	genus	egg scatterers	genus	2.07405
F0129	wild	Singapore Strait	St Johns Island	NA	2.5	Eupercaria/misc	Gerreidae		Gerres	Gerres oyena	species	2.72	0.22	benthic	species	nonguarders	genus	egg scatterers	genus	2.07405
F0131	wild	Singapore Strait	St Johns Island	NA	3.3	Eupercaria/misc	Gerreidae		Gerres	Gerres oyena	species	2.72	0.22	benthic	species	nonguarders	genus	egg scatterers	genus	2.07405
F0132	wild	Singapore Strait	St Johns Island	NA	4.5	Eupercaria/misc	Gerreidae		Gerres	Gerres oyena	species	2.72	0.22	benthic	species	nonguarders	genus	egg scatterers	genus	2.07405
F0135	wild	Singapore Strait	St Johns Island	NA	6	Eupercaria/misc	Gerreidae		Gerres	Gerres oyena	species	2.72	0.22	benthic	species	nonguarders	genus	egg scatterers	genus	2.07405
F0137	wild	Singapore Strait	St Johns Island	NA	6.6	Eupercaria/misc	Gerreidae		Gerres	Gerres oyena	species	2.72	0.22	benthic	species	nonguarders	genus	egg scatterers	genus	2.07405
F0148	wild	Singapore Strait	Lazarus Island	NA	3.7	Atheriniformes	Atherinidae	Atherinomorinae	Atherinomorus	Atherinomorus sp	genus	3.27	0.24	benthic	genus	nonguarders	subfamily	egg scatterers	subfamily	NA
F0149	wild	Singapore Strait	Lazarus Island	NA	3.2	Atheriniformes	Atherinidae	Atherinomorinae	Atherinomorus	Atherinomorus sp	genus	3.27	0.24	benthic	genus	nonguarders	subfamily	egg scatterers	subfamily	NA
F0150	wild	Singapore Strait	Lazarus Island	NA	3.7	Atheriniformes	Atherinidae	Atherinomorinae	Atherinomorus	Atherinomorus sp	genus	3.27	0.24	benthic	genus	nonguarders	subfamily	egg scatterers	subfamily	NA
F0151	wild	Singapore Strait	Lazarus Island	NA	4.2	Atheriniformes	Atherinidae	Atherinomorinae	Atherinomorus	Atherinomorus sp	genus	3.27	0.24	benthic	genus	nonguarders	subfamily	egg scatterers	subfamily	NA
F0153	wild	Singapore Strait	Lazarus Island	NA	4.3	Atheriniformes	Atherinidae	Atherinomorinae	Atherinomorus	Atherinomorus sp	genus	3.27	0.24	benthic	genus	nonguarders	subfamily	egg scatterers	subfamily	NA
F0155	wild	Singapore Strait	St Johns Island	NA	5.5	Kurtiformes	Apogonidae	Apogoninae	Fibramia	Fibramia lateralis	species	3.98	0.24	pelagic	species	bearers	species	external brooders	species	1.57557
F0156	wild	Singapore Strait	St Johns Island	NA	5.7	Kurtiformes	Apogonidae	Apogoninae	Fibramia	Fibramia lateralis	species	3.98	0.24	pelagic	species	bearers	species	external brooders	species	1.57557
F0157	wild	Singapore Strait	St Johns Island	NA	5.3	Kurtiformes	Apogonidae	Apogoninae	Fibramia	Fibramia lateralis	species	3.98	0.24	pelagic	species	bearers	species	external brooders	species	1.57557
F0158	wild	Singapore Strait	St Johns Island	NA	5.6	Kurtiformes	Apogonidae	Apogoninae	Fibramia	Fibramia lateralis	species	3.98	0.24	pelagic	species	bearers	species	external brooders	species	1.57557
F0161	wild	Singapore Strait	St Johns Island	NA	5.4	Kurtiformes	Apogonidae	Apogoninae	Fibramia	Fibramia lateralis	species	3.98	0.24	pelagic	species	bearers	species	external brooders	species	1.57557
F0162	wild	Singapore Strait	St Johns Island	NA	5.5	Kurtiformes	Apogonidae	Apogoninae	Fibramia	Fibramia lateralis	species	3.98	0.24	pelagic	species	bearers	species	external brooders	species	1.57557
F0163	wild	Singapore Strait	Pulau Semakau	NA	12.5	Eupercaria/misc	Lutjanidae	Lutjaninae	Lutjanus	Lutjanus carponotatus	species	3.89	0.24	pelagic	species	nonguarders	species	egg scatterers	species	2.04096
F0164	wild	Singapore Strait	Pulau Semakau	NA	11.5	Kurtiformes	Apogonidae	Apogoninae	Pristicon	Pristicon rhodopterus	species	3.5	0.23	benthic	species	bearers	species	external brooders	species	1.45383
F0166	wild	Johor Strait	Changi Beach	NA	13.1	Siluriformes	Plotosidae		Plotosus	Plotosus lineatus	species	3.57	0.29	benthic	species	guarders	species	nesters	species	NA
F0167	wild	Johor Strait	Changi Beach	NA	13.8	Siluriformes	Plotosidae		Plotosus	Plotosus lineatus	species	3.57	0.29	benthic	species	guarders	species	nesters	species	NA
F0168	wild	Johor Strait	Changi Beach	NA	13	Siluriformes	Plotosidae		Plotosus	Plotosus lineatus	species	3.57	0.29	benthic	species	guarders	species	nesters	species	NA
F0169	wild	Johor Strait	Changi Beach	NA	13.6	Siluriformes	Plotosidae		Plotosus	Plotosus lineatus	species	3.57	0.29	benthic	species	guarders	species	nesters	species	NA
F0170	wild	Johor Strait	Changi Beach	NA	14.2	Siluriformes	Plotosidae		Plotosus	Plotosus lineatus	species	3.57	0.29	benthic	species	guarders	species	nesters	species	NA
F0177	wild	Singapore Strait	Pulau Sentosa	NA	11.3	Perciformes/Serranoidei	Serranidae	Epinephelinae	Cephalopholis	Cephalopholis boenak	species	4.07	0.25	pelagic	species	nonguarders	species	egg scatterers	species	1.38967
F0178	wild	Singapore Strait	Pulau Sentosa	NA	12.3	Perciformes/Serranoidei	Serranidae	Epinephelinae	Cephalopholis	Cephalopholis boenak	species	4.07	0.25	pelagic	species	nonguarders	species	egg scatterers	species	1.38967
F0179	wild	Singapore Strait	Pulau Hantu	NA	3.7	Ovalentaria/misc	Pomacentridae	Pomacentrinae	Pomacentrus	Pomacentrus sp	genus	2.68	0.25	benthic	genus	guarders	genus	nesters	genus	NA
F0181	wild	Singapore Strait	Pulau Sentosa	NA	13.5	Eupercaria/misc	Nemipteridae		Pentapodus	Pentapodus setosus	species	3.5	0.25	benthic	species	nonguarders	family	egg scatterers	family	2.17278
F0182	wild	Singapore Strait	Pulau Semakau	NA	10.4	Acanthuriformes	Chaetodontidae		Chelmon	Chelmon rostratus	species	3.5	0.29	benthic	species	nonguarders	species	egg scatterers	species	2.67245
F0183	wild	Singapore Strait	Pulau Semakau	NA	10	Acanthuriformes	Chaetodontidae		Chelmon	Chelmon rostratus	species	3.5	0.29	benthic	species	nonguarders	species	egg scatterers	species	2.67245
F0185	wild	Singapore Strait	Pulau Semakau	NA	11.5	Perciformes/Serranoidei	Serranidae	Diploprioninae	Diploprion	Diploprion bifasciatum	species	3.98	0.28	pelagic	species	nonguarders	species	egg scatterers	species	1.74264
F0187	wild	Singapore Strait	Pulau Hantu	109.03	15.3	Tetraodontiformes	Monacanthidae		Pseudomonacanthus	Pseudomonacanthus macrurus	species	2.85	0.25	benthic	family	nonguarders	family	nesters	family	1.48998
F0188	wild	Singapore Strait	Pulau Hantu	151.28	17.4	Tetraodontiformes	Monacanthidae		Pseudomonacanthus	Pseudomonacanthus macrurus	species	2.85	0.25	benthic	family	nonguarders	family	nesters	family	1.48998
F0189	wild	Singapore Strait	Pulau Hantu	173.18	17.7	Tetraodontiformes	Monacanthidae		Pseudomonacanthus	Pseudomonacanthus macrurus	species	2.85	0.25	benthic	family	nonguarders	family	nesters	family	1.48998
F0190	wild	Johor Strait	Sungei ApiApi rivermouth	NA	5.4	Mugiliformes	Mugilidae		Crenimugil	Crenimugil sp	genus	2.3	0.24	benthic	genus	nonguarders	genus	egg scatterers	genus	NA
F0191	wild	Johor Strait	Sungei ApiApi rivermouth	NA	6.9	Mugiliformes	Mugilidae		Planiliza	Planiliza subviridis	species	2.74	0.26	benthic	species	nonguarders	species	egg scatterers	species	1.51454
F0192	wild	Johor Strait	Sungei ApiApi rivermouth	NA	7.2	Mugiliformes	Mugilidae		Planiliza	Planiliza subviridis	species	2.74	0.26	benthic	species	nonguarders	species	egg scatterers	species	1.51454
F0193	wild	Johor Strait	Sungei ApiApi rivermouth	10.13	7.7	Mugiliformes	Mugilidae		Planiliza	Planiliza subviridis	species	2.74	0.26	benthic	species	nonguarders	species	egg scatterers	species	1.51454
F0194	wild	Johor Strait	Sungei ApiApi rivermouth	14.57	8.8	Mugiliformes	Mugilidae		Planiliza	Planiliza subviridis	species	2.74	0.26	benthic	species	nonguarders	species	egg scatterers	species	1.51454
F0196	wild	Singapore Strait	Pulau Kusu	16.65	8.6	Eupercaria/misc	Gerreidae		Gerres	Gerres oyena	species	2.72	0.22	benthic	species	nonguarders	genus	egg scatterers	genus	2.07405
F0197	wild	Singapore Strait	Pulau Kusu	10.08	7.7	Eupercaria/misc	Gerreidae		Gerres	Gerres oyena	species	2.72	0.22	benthic	species	nonguarders	genus	egg scatterers	genus	2.07405
F0198	wild	Singapore Strait	Pulau Kusu	12.02	7.5	Eupercaria/misc	Gerreidae		Gerres	Gerres oyena	species	2.72	0.22	benthic	species	nonguarders	genus	egg scatterers	genus	2.07405
F0199	wild	Singapore Strait	Pulau Kusu	15.43	8.9	Eupercaria/misc	Gerreidae		Gerres	Gerres oyena	species	2.72	0.22	benthic	species	nonguarders	genus	egg scatterers	genus	2.07405
F0200	wild	Singapore Strait	Pulau Kusu	10.68	7.6	Eupercaria/misc	Gerreidae		Gerres	Gerres oyena	species	2.72	0.22	benthic	species	nonguarders	genus	egg scatterers	genus	2.07405
F0202	wild	Singapore Strait	Pulau Kusu	17.78	8.6	Eupercaria/misc	Gerreidae		Gerres	Gerres oyena	species	2.72	0.22	benthic	species	nonguarders	genus	egg scatterers	genus	2.07405
F0203	wild	Singapore Strait	Pulau Kusu	7.49	6.7	Eupercaria/misc	Gerreidae		Gerres	Gerres oyena	species	2.72	0.22	benthic	species	nonguarders	genus	egg scatterers	genus	2.07405
F0204	wild	Singapore Strait	Pulau Kusu	17.02	8.8	Eupercaria/misc	Gerreidae		Gerres	Gerres oyena	species	2.72	0.22	benthic	species	nonguarders	genus	egg scatterers	genus	2.07405
F0205	wild	Singapore Strait	Pulau Kusu	10.06	7.2	Eupercaria/misc	Gerreidae		Gerres	Gerres oyena	species	2.72	0.22	benthic	species	nonguarders	genus	egg scatterers	genus	2.07405
F0206	wild	Singapore Strait	Pulau Kusu	10.99	7.5	Eupercaria/misc	Gerreidae		Gerres	Gerres oyena	species	2.72	0.22	benthic	species	nonguarders	genus	egg scatterers	genus	2.07405
F0207	wild	Singapore Strait	Pulau Kusu	7.18	6.7	Eupercaria/misc	Gerreidae		Gerres	Gerres oyena	species	2.72	0.22	benthic	species	nonguarders	genus	egg scatterers	genus	2.07405
F0209	wild	Singapore Strait	Pulau Kusu	0.28	2.5	Atheriniformes	Atherinidae			Atherinidae sp	family	3.15	0.24	pelagic	family	nonguarders	family	egg scatterers	family	NA
F0210	wild	Singapore Strait	Pulau Kusu	0.87	4	Atheriniformes	Atherinidae			Atherinidae sp	family	3.15	0.24	pelagic	family	nonguarders	family	egg scatterers	family	NA
F0211	wild	Singapore Strait	Pulau Kusu	1.14	4.1	Atheriniformes	Atherinidae			Atherinidae sp	family	3.15	0.24	pelagic	family	nonguarders	family	egg scatterers	family	NA
F0212	wild	Singapore Strait	Pulau Kusu	0.84	3.9	Atheriniformes	Atherinidae			Atherinidae sp	family	3.15	0.24	pelagic	family	nonguarders	family	egg scatterers	family	NA
F0213	wild	Singapore Strait	Pulau Kusu	0.29	2.8	Atheriniformes	Atherinidae	Atherinomorinae	Hypoatherina	Hypoatherina valenciennei	species	3.17	0.25	pelagic	species	nonguarders	subfamily	egg scatterers	subfamily	NA
F0214	wild	Singapore Strait	Pulau Kusu	0.52	3.2	Atheriniformes	Atherinidae			Atherinidae sp	family	3.15	0.24	pelagic	family	nonguarders	family	egg scatterers	family	NA
F0215	wild	Singapore Strait	Pulau Kusu	0.22	2.5	Atheriniformes	Atherinidae			Atherinidae sp	family	3.15	0.24	pelagic	family	nonguarders	family	egg scatterers	family	NA
F0216	wild	Singapore Strait	Pulau Kusu	0.1	2.2	Atheriniformes	Atherinidae	Atherinomorinae	Atherinomorus	Atherinomorus lacunosus	species	3.29	0.26	pelagic	species	nonguarders	subfamily	egg scatterers	subfamily	1.47367
F0217	wild	Singapore Strait	Pulau Tekukor	6.57	6.9	Eupercaria/misc	Nemipteridae		Pentapodus	Pentapodus setosus	species	3.5	0.25	benthic	species	nonguarders	family	egg scatterers	family	2.17278
F0218	wild	Singapore Strait	Pulau Kusu	0.63	2.9	Eupercaria/misc	Gerreidae		Gerres	Gerres oyena	species	2.72	0.22	benthic	species	nonguarders	genus	egg scatterers	genus	2.07405
F0219	wild	Singapore Strait	Pulau Kusu	1.42	3.3	Ovalentaria/misc	Ambassidae		Ambassis	Ambassis kopsii	species	3.04	0.3	benthic	species	nonguarders	genus	egg scatterers	genus	1.20245
F0221	wild	Singapore Strait	Pulau Kusu	0.91	3.5	Eupercaria/misc	Gerreidae		Gerres	Gerres oyena	species	2.72	0.22	benthic	species	nonguarders	genus	egg scatterers	genus	2.07405
F0222	wild	Singapore Strait	Pulau Kusu	2.58	4.6	Eupercaria/misc	Gerreidae		Gerres	Gerres oyena	species	2.72	0.22	benthic	species	nonguarders	genus	egg scatterers	genus	2.07405
F0223	wild	Singapore Strait	Pulau Kusu	2.46	4.4	Eupercaria/misc	Gerreidae		Gerres	Gerres oyena	species	2.72	0.22	benthic	species	nonguarders	genus	egg scatterers	genus	2.07405
F0224	wild	Singapore Strait	Pulau Kusu	4.49	5.6	Eupercaria/misc	Gerreidae		Gerres	Gerres oyena	species	2.72	0.22	benthic	species	nonguarders	genus	egg scatterers	genus	2.07405
F0225	wild	Singapore Strait	Pulau Kusu	9.38	7.1	Eupercaria/misc	Gerreidae		Gerres	Gerres oyena	species	2.72	0.22	benthic	species	nonguarders	genus	egg scatterers	genus	2.07405
F0226	wild	Singapore Strait	Pulau Kusu	0.73	3.2	Eupercaria/misc	Gerreidae		Gerres	Gerres oyena	species	2.72	0.22	benthic	species	nonguarders	genus	egg scatterers	genus	2.07405
F0227	wild	Singapore Strait	Pulau Kusu	7.8	6.6	Eupercaria/misc	Gerreidae		Gerres	Gerres oyena	species	2.72	0.22	benthic	species	nonguarders	genus	egg scatterers	genus	2.07405
F0228	wild	Singapore Strait	Pulau Kusu	8.66	5.8	Ovalentaria/misc	Ambassidae		Ambassis	Ambassis kopsii	species	3.04	0.3	benthic	species	nonguarders	genus	egg scatterers	genus	1.20245
F0229	wild	Singapore Strait	Pulau Kusu	12.56	7.7	Eupercaria/misc	Gerreidae		Gerres	Gerres oyena	species	2.72	0.22	benthic	species	nonguarders	genus	egg scatterers	genus	2.07405
F0230	wild	Singapore Strait	Pulau Kusu	0.72	3.5	Atheriniformes	Atherinidae	Atherinomorinae	Atherinomorus	Atherinomorus sp	genus	3.27	0.24	benthic	genus	nonguarders	subfamily	egg scatterers	subfamily	NA
F0231	wild	Singapore Strait	Pulau Kusu	0.85	3.7	Atheriniformes	Atherinidae	Atherinomorinae	Atherinomorus	Atherinomorus sp	genus	3.27	0.24	benthic	genus	nonguarders	subfamily	egg scatterers	subfamily	NA
F0232	wild	Singapore Strait	Pulau Tekukor	38.06	12.2	Eupercaria/misc	Nemipteridae		Pentapodus	Pentapodus setosus	species	3.5	0.25	benthic	species	nonguarders	family	egg scatterers	family	2.17278
F0233	wild	Singapore Strait	Pulau Tekukor	30.97	11.2	Eupercaria/misc	Nemipteridae		Pentapodus	Pentapodus setosus	species	3.5	0.25	benthic	species	nonguarders	family	egg scatterers	family	2.17278
F0234	wild	Singapore Strait	Pulau Tekukor	45.1	12.9	Eupercaria/misc	Nemipteridae		Pentapodus	Pentapodus setosus	species	3.5	0.25	benthic	species	nonguarders	family	egg scatterers	family	2.17278
F0237	wild	Singapore Strait	Tanah Merah Beach PCN	7.81	5.9	Kurtiformes	Apogonidae	Apogoninae	Fibramia	Fibramia lateralis	species	3.98	0.24	pelagic	species	bearers	species	external brooders	species	1.57557
F0238	wild	Singapore Strait	Tanah Merah Beach PCN	8.06	5.9	Kurtiformes	Apogonidae	Apogoninae	Fibramia	Fibramia lateralis	species	3.98	0.24	pelagic	species	bearers	species	external brooders	species	1.57557
F0239	wild	Singapore Strait	Tanah Merah Beach PCN	7.96	6.2	Kurtiformes	Apogonidae	Apogoninae	Fibramia	Fibramia lateralis	species	3.98	0.24	pelagic	species	bearers	species	external brooders	species	1.57557
F0240	wild	Singapore Strait	Tanah Merah Beach PCN	5.06	7.3	Clupeiformes	Engraulidae	Coiliinae	Thryssa	Thryssa hamiltonii	species	3.45	0.2	benthic	species	nonguarders	species	egg scatterers	species	2.44428
F0241	wild	Singapore Strait	Tanah Merah Beach PCN	5.83	7.7	Clupeiformes	Engraulidae	Coiliinae	Thryssa	Thryssa hamiltonii	species	3.45	0.2	benthic	species	nonguarders	species	egg scatterers	species	2.44428
F0242	wild	Singapore Strait	Tanah Merah Beach PCN	4.65	7.1	Clupeiformes	Engraulidae	Coiliinae	Thryssa	Thryssa hamiltonii	species	3.45	0.2	benthic	species	nonguarders	species	egg scatterers	species	2.44428
F0248	wild	Singapore Strait	Tanah Merah Beach PCN	6.86	7.8	Clupeiformes	Engraulidae	Coiliinae	Thryssa	Thryssa hamiltonii	species	3.45	0.2	benthic	species	nonguarders	species	egg scatterers	species	2.44428
F0249	wild	Singapore Strait	Tanah Merah Beach PCN	11.65	9.5	Clupeiformes	Engraulidae	Coiliinae	Thryssa	Thryssa hamiltonii	species	3.45	0.2	benthic	species	nonguarders	species	egg scatterers	species	2.44428
F0250	wild	Singapore Strait	Tanah Merah Beach PCN	6.6	5.8	Tetraodontiformes	Monacanthidae		Monacanthus	Monacanthus chinensis	species	2.36	0.24	benthic	genus	guarders	species	nesters	species	2.71491
F0252	wild	Singapore Strait	Tanah Merah Beach PCN	6.6	5.6	Tetraodontiformes	Monacanthidae		Monacanthus	Monacanthus chinensis	species	2.36	0.24	benthic	genus	guarders	species	nesters	species	2.71491
F0253	wild	Singapore Strait	Tanah Merah Beach PCN	8.7	5.7	Tetraodontiformes	Monacanthidae		Monacanthus	Monacanthus chinensis	species	2.36	0.24	benthic	genus	guarders	species	nesters	species	2.71491
F0255	wild	Singapore Strait	Tanah Merah Beach PCN	8.3	6	Tetraodontiformes	Monacanthidae		Monacanthus	Monacanthus chinensis	species	2.36	0.24	benthic	genus	guarders	species	nesters	species	2.71491
F0258	wild	Singapore Strait	Tanah Merah Beach PCN	4.9	5.1	Tetraodontiformes	Monacanthidae		Monacanthus	Monacanthus chinensis	species	2.36	0.24	benthic	genus	guarders	species	nesters	species	2.71491
F0259	wild	Singapore Strait	Tanah Merah Beach PCN	8.7	6.2	Tetraodontiformes	Monacanthidae		Monacanthus	Monacanthus chinensis	species	2.36	0.24	benthic	genus	guarders	species	nesters	species	2.71491
F0270	wild	Singapore Strait	Tanah Merah Beach PCN	1.4	3.8	Kurtiformes	Apogonidae	Apogoninae	Ostorhinchus	Ostorhinchus margaritophorus	species	3.37	0.27	benthic	genus	bearers	species	external brooders	species	1.43237
F0271	wild	Singapore Strait	Tanah Merah Beach PCN	1.1	3.6	Kurtiformes	Apogonidae	Apogoninae	Ostorhinchus	Ostorhinchus margaritophorus	species	3.37	0.27	benthic	genus	bearers	species	external brooders	species	1.43237
F0272	wild	Singapore Strait	Tanah Merah Beach PCN	1.9	4.3	Kurtiformes	Apogonidae	Apogoninae	Ostorhinchus	Ostorhinchus margaritophorus	species	3.37	0.27	benthic	genus	bearers	species	external brooders	species	1.43237
F0273	wild	Singapore Strait	Tanah Merah Beach PCN	1.9	4.3	Kurtiformes	Apogonidae	Apogoninae	Ostorhinchus	Ostorhinchus margaritophorus	species	3.37	0.27	benthic	genus	bearers	species	external brooders	species	1.43237
F0274	wild	Singapore Strait	Tanah Merah Beach PCN	1	3.6	Kurtiformes	Apogonidae	Apogoninae	Ostorhinchus	Ostorhinchus margaritophorus	species	3.37	0.27	benthic	genus	bearers	species	external brooders	species	1.43237
F0275	wild	Singapore Strait	Tanah Merah Beach PCN	1.1	3.7	Kurtiformes	Apogonidae	Apogoninae	Ostorhinchus	Ostorhinchus margaritophorus	species	3.37	0.27	benthic	genus	bearers	species	external brooders	species	1.43237
F0276	wild	Singapore Strait	Tanah Merah Beach PCN	1.3	3.8	Kurtiformes	Apogonidae	Apogoninae	Ostorhinchus	Ostorhinchus margaritophorus	species	3.37	0.27	benthic	genus	bearers	species	external brooders	species	1.43237
F0277	wild	Singapore Strait	Tanah Merah Beach PCN	1.2	3.7	Kurtiformes	Apogonidae	Apogoninae	Ostorhinchus	Ostorhinchus margaritophorus	species	3.37	0.27	benthic	genus	bearers	species	external brooders	species	1.43237
F0278	wild	Singapore Strait	Tanah Merah Beach PCN	1.3	3.9	Kurtiformes	Apogonidae	Apogoninae	Ostorhinchus	Ostorhinchus margaritophorus	species	3.37	0.27	benthic	genus	bearers	species	external brooders	species	1.43237
F0279	wild	Singapore Strait	Tanah Merah Beach PCN	1.3	3.8	Kurtiformes	Apogonidae	Apogoninae	Ostorhinchus	Ostorhinchus margaritophorus	species	3.37	0.27	benthic	genus	bearers	species	external brooders	species	1.43237
F0280	wild	Singapore Strait	Tanah Merah Beach PCN	1.3	3.7	Kurtiformes	Apogonidae	Apogoninae	Ostorhinchus	Ostorhinchus margaritophorus	species	3.37	0.27	benthic	genus	bearers	species	external brooders	species	1.43237
F0288	wild	Singapore Strait	Tanah Merah Beach PCN	1.8	12.7	Syngnathiformes	Centriscidae	Centriscinae	Aeoliscus	Aeoliscus strigatus	species	3.46	0.26	pelagic	species	nonguarders	species	egg scatterers	species	NA
F0293	wild	Singapore Strait	Tanah Merah Beach PCN	0.9	3.9	Clupeiformes	Clupeidae	Dorosomatinae	Anodontostoma	Anodontostoma chacunda	species	juvenile	0.24	benthic	species	nonguarders	species	egg scatterers	species	2.72814
F0296	wild	Singapore Strait	Tanah Merah Beach PCN	1.4	4.3	Clupeiformes	Clupeidae	Dorosomatinae	Anodontostoma	Anodontostoma chacunda	species	juvenile	0.24	benthic	species	nonguarders	species	egg scatterers	species	2.72814
F0301	wild	Singapore Strait	Tanah Merah Beach PCN	14.5	8.5	Eupercaria/misc	Lethrinidae	Lethrininae	Lethrinus	Lethrinus lentjan	species	3.94	0.24	benthic	species	nonguarders	species	egg scatterers	species	2.30616
F0302	wild	Singapore Strait	Tanah Merah Beach PCN	10.5	7.7	Eupercaria/misc	Lethrinidae	Lethrininae	Lethrinus	Lethrinus lentjan	species	3.94	0.24	benthic	species	nonguarders	species	egg scatterers	species	2.30616
F0303	wild	Singapore Strait	Tanah Merah Beach PCN	17.7	8.8	Eupercaria/misc	Lethrinidae	Lethrininae	Lethrinus	Lethrinus lentjan	species	3.94	0.24	benthic	species	nonguarders	species	egg scatterers	species	2.30616
F0306	wild	Singapore Strait	Tanah Merah Beach PCN	14.2	8.3	Eupercaria/misc	Lethrinidae	Lethrininae	Lethrinus	Lethrinus lentjan	species	3.94	0.24	benthic	species	nonguarders	species	egg scatterers	species	2.30616
F0308	wild	Singapore Strait	Tanah Merah Beach PCN	9.6	7.5	Eupercaria/misc	Lethrinidae	Lethrininae	Lethrinus	Lethrinus lentjan	species	3.94	0.24	benthic	species	nonguarders	species	egg scatterers	species	2.30616
F0310	wild	Singapore Strait	Tanah Merah Beach PCN	16.3	8.7	Eupercaria/misc	Lethrinidae	Lethrininae	Lethrinus	Lethrinus lentjan	species	3.94	0.24	benthic	species	nonguarders	species	egg scatterers	species	2.30616
F0311	wild	Singapore Strait	Republic of Singapore Yatch Club	0.1078	1.8	Mulliformes	Mullidae		Upeneus	Upeneus margarethae	species	3.41	0.26	benthic	genus	nonguarders	genus	egg scatterers	genus	NA
F0312	wild	Singapore Strait	Republic of Singapore Yatch Club	0.0732	1.5	Mulliformes	Mullidae		Upeneus	Upeneus margarethae	species	3.41	0.26	benthic	genus	nonguarders	genus	egg scatterers	genus	NA
F0313	wild	Singapore Strait	Republic of Singapore Yatch Club	0.2178	2.3	Beloniformes	Exocoetidae		Parexocoetus	Parexocoetus mento	species	3.29	0.23	pelagic	genus	nonguarders	species	egg scatterers	genus	2.45404
F0314	wild	Singapore Strait	Republic of Singapore Yatch Club	0.1494	2.1	Mulliformes	Mullidae		Upeneus	Upeneus margarethae	species	3.41	0.26	benthic	genus	nonguarders	genus	egg scatterers	genus	NA
F0315	wild	Singapore Strait	Republic of Singapore Yatch Club	0.0795	1.7	Mulliformes	Mullidae		Upeneus	Upeneus margarethae	species	3.41	0.26	benthic	genus	nonguarders	genus	egg scatterers	genus	NA
F0316	wild	Singapore Strait	Republic of Singapore Yatch Club	0.114	1.9	Mulliformes	Mullidae		Upeneus	Upeneus margarethae	species	3.41	0.26	benthic	genus	nonguarders	genus	egg scatterers	genus	NA
F0317	wild	Singapore Strait	Republic of Singapore Yatch Club	0.3817	2.8	Mulliformes	Mullidae		Upeneus	Upeneus margarethae	species	3.41	0.26	benthic	genus	nonguarders	genus	egg scatterers	genus	NA
F0318	wild	Singapore Strait	Republic of Singapore Yatch Club	0.9	3.7	Atheriniformes	Atherinidae			Atherinidae sp	family	3.15	0.24	pelagic	family	nonguarders	family	egg scatterers	family	NA
F0321	wild	Singapore Strait	Pulau Tekukor	42.4	9.6	Ovalentaria/misc	Pomacentridae	Pomacentrinae	Pomacentrus	Pomacentrus littoralis	species	2.16	0.25	benthic	species	guarders	species	nesters	species	NA
F0322	wild	Singapore Strait	Pulau Tekukor	38.8	9.2	Ovalentaria/misc	Pomacentridae	Pomacentrinae	Pomacentrus	Pomacentrus littoralis	species	2.16	0.25	benthic	species	guarders	species	nesters	species	NA
F0344	wild	Singapore Strait	Pulau Tekukor	2	4.3	Kurtiformes	Apogonidae	Apogoninae	Ostorhinchus	Ostorhinchus cavitensis	species	3.41	0.25	benthic	genus	bearers	species	external brooders	species	1.36296
F0345	wild	Johor Strait	Sungei ApiApi rivermouth	5.1	6	Beloniformes	Zenarchopteridae		Zenarchopterus	Zenarchopterus buffonis	species	2.5	0.29	benthic	genus	bearers	species	internal live bearers	species	0.781812
F0346	wild	Johor Strait	Sungei ApiApi rivermouth	2.4	6.8	Beloniformes	Zenarchopteridae		Zenarchopterus	Zenarchopterus gilli	species	2.86	0.28	benthic	genus	bearers	species	internal live bearers	species	0.829238
F0347	wild	Johor Strait	Sungei ApiApi rivermouth	5.8	9.3	Beloniformes	Zenarchopteridae		Zenarchopterus	Zenarchopterus gilli	species	2.86	0.28	benthic	genus	bearers	species	internal live bearers	species	0.829238
F0348	wild	Johor Strait	Sungei ApiApi rivermouth	7	10.6	Beloniformes	Zenarchopteridae		Zenarchopterus	Zenarchopterus buffonis	species	2.5	0.29	benthic	genus	bearers	species	internal live bearers	species	0.781812
F0349	wild	Johor Strait	Sungei ApiApi rivermouth	8.7	10.7	Beloniformes	Zenarchopteridae		Zenarchopterus	Zenarchopterus gilli	species	2.86	0.28	benthic	genus	bearers	species	internal live bearers	species	0.829238
F0350	wild	Johor Strait	Sungei ApiApi rivermouth	8.1	13.7	Beloniformes	Zenarchopteridae		Zenarchopterus	Zenarchopterus gilli	species	2.86	0.28	benthic	genus	bearers	species	internal live bearers	species	0.829238
F0353	wild	Singapore Strait	St Johns Island	0.9	4.2	Atheriniformes	Atherinidae	Atherinomorinae	Hypoatherina	Hypoatherina valenciennei	species	3.17	0.25	pelagic	species	nonguarders	subfamily	egg scatterers	subfamily	NA
F0354	wild	Singapore Strait	St Johns Island	0.3	2.8	Atheriniformes	Atherinidae	Atherinomorinae	Atherinomorus	Atherinomorus lacunosus	species	3.29	0.26	pelagic	species	nonguarders	subfamily	egg scatterers	subfamily	1.47367
F0356	wild	Singapore Strait	St Johns Island	0.7	4	Atheriniformes	Atherinidae	Atherinomorinae	Hypoatherina	Hypoatherina valenciennei	species	3.17	0.25	pelagic	species	nonguarders	subfamily	egg scatterers	subfamily	NA
F0358	wild	Johor Strait	Sungei ApiApi rivermouth	0.8	2.8	Ovalentaria/misc	Ambassidae		Ambassis	Ambassis kopsii	species	3.04	0.3	benthic	species	nonguarders	genus	egg scatterers	genus	1.20245
F0359	wild	Johor Strait	Sungei ApiApi rivermouth	0.5	2.3	Ovalentaria/misc	Ambassidae		Ambassis	Ambassis kopsii	species	3.04	0.3	benthic	species	nonguarders	genus	egg scatterers	genus	1.20245
F0360	wild	Johor Strait	Sungei ApiApi rivermouth	0.4	2.3	Ovalentaria/misc	Ambassidae		Ambassis	Ambassis kopsii	species	3.04	0.3	benthic	species	nonguarders	genus	egg scatterers	genus	1.20245
F0361	wild	Johor Strait	Sungei ApiApi rivermouth	0.6	2.4	Ovalentaria/misc	Ambassidae		Ambassis	Ambassis kopsii	species	3.04	0.3	benthic	species	nonguarders	genus	egg scatterers	genus	1.20245
F0362	wild	Johor Strait	Sungei ApiApi rivermouth	0.4	2	Ovalentaria/misc	Ambassidae		Ambassis	Ambassis kopsii	species	3.04	0.3	benthic	species	nonguarders	genus	egg scatterers	genus	1.20245
F0363	wild	Johor Strait	Sungei ApiApi rivermouth	0.4	2.3	Ovalentaria/misc	Ambassidae		Ambassis	Ambassis kopsii	species	3.04	0.3	benthic	species	nonguarders	genus	egg scatterers	genus	1.20245
F0364	wild	Johor Strait	Sungei ApiApi rivermouth	0.5	2.2	Ovalentaria/misc	Ambassidae		Ambassis	Ambassis kopsii	species	3.04	0.3	benthic	species	nonguarders	genus	egg scatterers	genus	1.20245
F0365	wild	Johor Strait	Sungei ApiApi rivermouth	0.3	1.9	Ovalentaria/misc	Ambassidae		Ambassis	Ambassis kopsii	species	3.04	0.3	benthic	species	nonguarders	genus	egg scatterers	genus	1.20245
F0366	wild	Johor Strait	Sungei ApiApi rivermouth	0.5	2.3	Ovalentaria/misc	Ambassidae		Ambassis	Ambassis kopsii	species	3.04	0.3	benthic	species	nonguarders	genus	egg scatterers	genus	1.20245
F0368	wild	Johor Strait	Sungei ApiApi rivermouth	0.6	2.6	Ovalentaria/misc	Ambassidae		Ambassis	Ambassis kopsii	species	3.04	0.3	benthic	species	nonguarders	genus	egg scatterers	genus	1.20245
F0369	wild	Johor Strait	Sungei ApiApi rivermouth	0.8	2.7	Ovalentaria/misc	Ambassidae		Ambassis	Ambassis kopsii	species	3.04	0.3	benthic	species	nonguarders	genus	egg scatterers	genus	1.20245
F0370	wild	Johor Strait	Sungei ApiApi rivermouth	1.2	3.2	Ovalentaria/misc	Ambassidae		Ambassis	Ambassis kopsii	species	3.04	0.3	benthic	species	nonguarders	genus	egg scatterers	genus	1.20245
F0371	wild	Johor Strait	Sungei ApiApi rivermouth	2.3	4	Ovalentaria/misc	Ambassidae		Ambassis	Ambassis kopsii	species	3.04	0.3	benthic	species	nonguarders	genus	egg scatterers	genus	1.20245
F0372	wild	Johor Strait	Sungei ApiApi rivermouth	2.2	3.8	Ovalentaria/misc	Ambassidae		Ambassis	Ambassis kopsii	species	3.04	0.3	benthic	species	nonguarders	genus	egg scatterers	genus	1.20245
F0374	wild	Johor Strait	Sungei ApiApi rivermouth	1.6	3.5	Ovalentaria/misc	Ambassidae		Ambassis	Ambassis kopsii	species	3.04	0.3	benthic	species	nonguarders	genus	egg scatterers	genus	1.20245
F0375	wild	Johor Strait	Sungei ApiApi rivermouth	1	3	Ovalentaria/misc	Ambassidae		Ambassis	Ambassis kopsii	species	3.04	0.3	benthic	species	nonguarders	genus	egg scatterers	genus	1.20245
F0377	wild	Johor Strait	Sungei ApiApi rivermouth	0.1096	1.4	Ovalentaria/misc	Ambassidae		Ambassis	Ambassis kopsii	species	3.04	0.3	benthic	species	nonguarders	genus	egg scatterers	genus	1.20245
F0378	wild	Johor Strait	Sungei ApiApi rivermouth	0.0539	1.2	Ovalentaria/misc	Ambassidae		Ambassis	Ambassis kopsii	species	3.04	0.3	benthic	species	nonguarders	genus	egg scatterers	genus	1.20245
F0379	wild	Johor Strait	Sungei ApiApi rivermouth	0.0674	1.2	Ovalentaria/misc	Ambassidae		Ambassis	Ambassis kopsii	species	3.04	0.3	benthic	species	nonguarders	genus	egg scatterers	genus	1.20245
F0381	wild	Johor Strait	Sungei ApiApi rivermouth	0.0956	1.4	Ovalentaria/misc	Ambassidae		Ambassis	Ambassis kopsii	species	3.04	0.3	benthic	species	nonguarders	genus	egg scatterers	genus	1.20245
F0382	wild	Johor Strait	Sungei ApiApi rivermouth	0.0901	1.4	Ovalentaria/misc	Ambassidae		Ambassis	Ambassis kopsii	species	3.04	0.3	benthic	species	nonguarders	genus	egg scatterers	genus	1.20245
F0384	wild	Johor Strait	Sungei ApiApi rivermouth	0.0795	1.3	Ovalentaria/misc	Ambassidae		Ambassis	Ambassis kopsii	species	3.04	0.3	benthic	species	nonguarders	genus	egg scatterers	genus	1.20245
F0385	wild	Johor Strait	Sungei ApiApi rivermouth	0.0835	1.4	Ovalentaria/misc	Ambassidae		Ambassis	Ambassis kopsii	species	3.04	0.3	benthic	species	nonguarders	genus	egg scatterers	genus	1.20245
F0386	wild	Johor Strait	Sungei ApiApi rivermouth	0.0614	1.2	Ovalentaria/misc	Ambassidae		Ambassis	Ambassis kopsii	species	3.04	0.3	benthic	species	nonguarders	genus	egg scatterers	genus	1.20245
F0387	wild	Johor Strait	Sungei ApiApi rivermouth	0.0772	1.3	Ovalentaria/misc	Ambassidae		Ambassis	Ambassis kopsii	species	3.04	0.3	benthic	species	nonguarders	genus	egg scatterers	genus	1.20245
F0388	wild	Johor Strait	Sungei ApiApi rivermouth	0.0668	1.2	Ovalentaria/misc	Ambassidae		Ambassis	Ambassis kopsii	species	3.04	0.3	benthic	species	nonguarders	genus	egg scatterers	genus	1.20245
F0390	wild	Johor Strait	Sungei ApiApi rivermouth	0.0586	1.2	Ovalentaria/misc	Ambassidae		Ambassis	Ambassis kopsii	species	3.04	0.3	benthic	species	nonguarders	genus	egg scatterers	genus	1.20245
F0391	wild	Johor Strait	Sungei ApiApi rivermouth	0.0749	1.3	Ovalentaria/misc	Ambassidae		Ambassis	Ambassis kopsii	species	3.04	0.3	benthic	species	nonguarders	genus	egg scatterers	genus	1.20245
F0394	wild	Johor Strait	Sungei ApiApi rivermouth	0.0998	1.4	Ovalentaria/misc	Ambassidae		Ambassis	Ambassis kopsii	species	3.04	0.3	benthic	species	nonguarders	genus	egg scatterers	genus	1.20245
F0395	wild	Johor Strait	Sungei ApiApi rivermouth	0.0832	1.3	Ovalentaria/misc	Ambassidae		Ambassis	Ambassis kopsii	species	3.04	0.3	benthic	species	nonguarders	genus	egg scatterers	genus	1.20245
F0396	wild	Johor Strait	Sungei ApiApi rivermouth	0.0752	1.3	Ovalentaria/misc	Ambassidae		Ambassis	Ambassis kopsii	species	3.04	0.3	benthic	species	nonguarders	genus	egg scatterers	genus	1.20245
F0397	wild	Johor Strait	Sungei ApiApi rivermouth	0.1321	1.5	Ovalentaria/misc	Ambassidae		Ambassis	Ambassis kopsii	species	3.04	0.3	benthic	species	nonguarders	genus	egg scatterers	genus	1.20245
F0400	wild	Johor Strait	Sungei ApiApi rivermouth	1.1	3.1	Ovalentaria/misc	Ambassidae		Ambassis	Ambassis kopsii	species	3.04	0.3	benthic	species	nonguarders	genus	egg scatterers	genus	1.20245
F0401	wild	Johor Strait	Sungei ApiApi rivermouth	0.6	2.4	Ovalentaria/misc	Ambassidae		Ambassis	Ambassis kopsii	species	3.04	0.3	benthic	species	nonguarders	genus	egg scatterers	genus	1.20245
F0402	wild	Johor Strait	Sungei ApiApi rivermouth	3.1	5	Mugiliformes	Mugilidae		Crenimugil	Crenimugil sp	genus	2.3	0.24	benthic	genus	nonguarders	genus	egg scatterers	genus	NA
F0403	wild	Johor Strait	Sungei ApiApi rivermouth	8.7	7.4	Mugiliformes	Mugilidae		Planiliza	Planiliza subviridis	species	2.74	0.26	benthic	species	nonguarders	species	egg scatterers	species	1.51454
F0404	wild	Johor Strait	Sungei ApiApi rivermouth	1.9	3.7	Ovalentaria/misc	Ambassidae		Ambassis	Ambassis kopsii	species	3.04	0.3	benthic	species	nonguarders	genus	egg scatterers	genus	1.20245
F0405	wild	Johor Strait	Sungei ApiApi rivermouth	1.4	3.3	Ovalentaria/misc	Ambassidae		Ambassis	Ambassis kopsii	species	3.04	0.3	benthic	species	nonguarders	genus	egg scatterers	genus	1.20245
F0406	wild	Johor Strait	Sungei ApiApi rivermouth	1.1	3.1	Ovalentaria/misc	Ambassidae		Ambassis	Ambassis kopsii	species	3.04	0.3	benthic	species	nonguarders	genus	egg scatterers	genus	1.20245
F0407	wild	Johor Strait	Sungei ApiApi rivermouth	2	3.9	Ovalentaria/misc	Ambassidae		Ambassis	Ambassis kopsii	species	3.04	0.3	benthic	species	nonguarders	genus	egg scatterers	genus	1.20245
F0408	wild	Johor Strait	Sungei ApiApi rivermouth	1.5	3.4	Ovalentaria/misc	Ambassidae		Ambassis	Ambassis kopsii	species	3.04	0.3	benthic	species	nonguarders	genus	egg scatterers	genus	1.20245
F0409	wild	Johor Strait	Sungei ApiApi rivermouth	0.4	2.3	Ovalentaria/misc	Ambassidae		Ambassis	Ambassis kopsii	species	3.04	0.3	benthic	species	nonguarders	genus	egg scatterers	genus	1.20245
F0410	wild	Johor Strait	Sungei ApiApi rivermouth	1.1	3.1	Ovalentaria/misc	Ambassidae		Ambassis	Ambassis kopsii	species	3.04	0.3	benthic	species	nonguarders	genus	egg scatterers	genus	1.20245
F0412	wild	Johor Strait	Sungei ApiApi rivermouth	1.5	3.4	Ovalentaria/misc	Ambassidae		Ambassis	Ambassis kopsii	species	3.04	0.3	benthic	species	nonguarders	genus	egg scatterers	genus	1.20245
F0413	wild	Johor Strait	Sungei ApiApi rivermouth	2.5	4.2	Ovalentaria/misc	Ambassidae		Ambassis	Ambassis kopsii	species	3.04	0.3	benthic	species	nonguarders	genus	egg scatterers	genus	1.20245
F0414	wild	Johor Strait	Sungei ApiApi rivermouth	3.8	4.6	Ovalentaria/misc	Ambassidae		Ambassis	Ambassis kopsii	species	3.04	0.3	benthic	species	nonguarders	genus	egg scatterers	genus	1.20245
F0416	wild	Johor Strait	Sungei ApiApi rivermouth	0.9	3.1	Acanthuriformes	Leiognathidae	Leiognathinae	Leiognathus	Aurigequula longispina	species	3.25	0.27	benthic	species	nonguarders	genus	egg scatterers	genus	3.0933
F0417	wild	Johor Strait	Sungei ApiApi rivermouth	0.0875	1.4	Ovalentaria/misc	Ambassidae		Ambassis	Ambassis kopsii	species	3.04	0.3	benthic	species	nonguarders	genus	egg scatterers	genus	1.20245
F0418	wild	Johor Strait	Sungei ApiApi rivermouth	0.0769	1.3	Ovalentaria/misc	Ambassidae		Ambassis	Ambassis kopsii	species	3.04	0.3	benthic	species	nonguarders	genus	egg scatterers	genus	1.20245
F0419	wild	Johor Strait	Sungei ApiApi rivermouth	0.0832	1.3	Ovalentaria/misc	Ambassidae		Ambassis	Ambassis kopsii	species	3.04	0.3	benthic	species	nonguarders	genus	egg scatterers	genus	1.20245
F0420	wild	Johor Strait	Sungei ApiApi rivermouth	0.3	2	Ovalentaria/misc	Ambassidae		Ambassis	Ambassis kopsii	species	3.04	0.3	benthic	species	nonguarders	genus	egg scatterers	genus	1.20245
F0421	wild	Johor Strait	Sungei ApiApi rivermouth	0.116	1.5	Ovalentaria/misc	Ambassidae		Ambassis	Ambassis kopsii	species	3.04	0.3	benthic	species	nonguarders	genus	egg scatterers	genus	1.20245
F0422	wild	Johor Strait	Sungei ApiApi rivermouth	0.5	2.3	Ovalentaria/misc	Ambassidae		Ambassis	Ambassis kopsii	species	3.04	0.3	benthic	species	nonguarders	genus	egg scatterers	genus	1.20245
F0423	wild	Johor Strait	Sungei ApiApi rivermouth	0.5	2.4	Ovalentaria/misc	Ambassidae		Ambassis	Ambassis kopsii	species	3.04	0.3	benthic	species	nonguarders	genus	egg scatterers	genus	1.20245
F0424	wild	Johor Strait	Sungei ApiApi rivermouth	3.2	4.3	Ovalentaria/misc	Ambassidae		Ambassis	Ambassis kopsii	species	3.04	0.3	benthic	species	nonguarders	genus	egg scatterers	genus	1.20245
F0425	wild	Johor Strait	Sungei ApiApi rivermouth	2.1	3.7	Ovalentaria/misc	Ambassidae		Ambassis	Ambassis kopsii	species	3.04	0.3	benthic	species	nonguarders	genus	egg scatterers	genus	1.20245
F0426	wild	Johor Strait	Sungei ApiApi rivermouth	3.2	4.3	Ovalentaria/misc	Ambassidae		Ambassis	Ambassis kopsii	species	3.04	0.3	benthic	species	nonguarders	genus	egg scatterers	genus	1.20245
F0427	wild	Johor Strait	Sungei ApiApi rivermouth	1.9	3.6	Ovalentaria/misc	Ambassidae		Ambassis	Ambassis kopsii	species	3.04	0.3	benthic	species	nonguarders	genus	egg scatterers	genus	1.20245
LF004e	farmed	Johor Strait	Farm C	720	32.5	Carangaria/misc	Latidae		Lates	Lates calcarifer	species	3.83	0.29	benthic	species	nonguarders	species	egg scatterers	species	1.0615
LF005e	farmed	Johor Strait	Farm C	930	35.5	Carangaria/misc	Latidae		Lates	Lates calcarifer	species	3.83	0.29	benthic	species	nonguarders	species	egg scatterers	species	1.0615
LF006e	farmed	Johor Strait	Farm C	820	34	Carangaria/misc	Latidae		Lates	Lates calcarifer	species	3.83	0.29	benthic	species	nonguarders	species	egg scatterers	species	1.0615
LF008e	farmed	Johor Strait	Farm C	960	36.5	Carangaria/misc	Latidae		Lates	Lates calcarifer	species	3.83	0.29	benthic	species	nonguarders	species	egg scatterers	species	1.0615
LF009e	farmed	Johor Strait	Farm C	480	23	Carangiformes	Carangidae	Trachinotinae	Trachinotus	Trachinotus sp	genus	3.69	0.28	benthic	genus	nonguarders	genus	egg scatterers	genus	NA
LF011e	farmed	Johor Strait	Farm C	460	24	Carangiformes	Carangidae	Trachinotinae	Trachinotus	Trachinotus sp	genus	3.69	0.28	benthic	genus	nonguarders	genus	egg scatterers	genus	NA
LF014e	wild	Singapore Strait	Pulau Satumu	1075.61	24	Acanthuriformes	Pomacanthidae		Pomacanthus	Pomacanthus annularis	species	2.63	0.26	benthic	species	nonguarders	genus	egg scatterers	genus	1.87996
LF015e	wild	Singapore Strait	Pulau Satumu	563.47	21.5	Acanthuriformes	Pomacanthidae		Pomacanthus	Pomacanthus annularis	species	2.63	0.26	benthic	species	nonguarders	genus	egg scatterers	genus	1.87996
LF016e	wild	Singapore Strait	St Johns Island	NA	NA	Tetraodontiformes	Tetraodontidae	Tetraodontinae	Arothron	Arothron sp	genus	3.33	0.26	benthic	genus	nonguarders	subfamily	egg scatterers	subfamily	NA
LF017e	wild	Singapore Strait	Pulau Kusu	NA	34	Tetraodontiformes	Tetraodontidae	Tetraodontinae	Arothron	Arothron sp	genus	3.33	0.26	benthic	genus	nonguarders	subfamily	egg scatterers	subfamily	NA
LF018e	wild	Singapore Strait	southern island	NA	NA	Perciformes/Serranoidei	Serranidae	Epinephelinae	Epinephelus	Epinephelus coioides	species	4.04	0.27	benthic	species	nonguarders	species	egg scatterers	species	1.28418
LF019e	wild	Singapore Strait	southern island	NA	NA	Perciformes/Serranoidei	Serranidae	Epinephelinae	Epinephelus	Epinephelus coioides	species	4.04	0.27	benthic	species	nonguarders	species	egg scatterers	species	1.28418
LF020e	wild	Singapore Strait	southern island	NA	38	Eupercaria/misc	Labridae	Bodianinae	Choerodon	Choerodon schoenleinii	species	3.38	0.23	benthic	species	nonguarders	genus	egg scatterers	genus	1.47955
LF021e	wild	Singapore Strait	Pulau Hantu	NA	35.3	Tetraodontiformes	Tetraodontidae	Tetraodontinae	Arothron	Arothron sp	genus	3.33	0.26	benthic	genus	nonguarders	subfamily	egg scatterers	subfamily	NA
LF022e	wild	Singapore Strait	Pulau Sentosa	NA	44	Eupercaria/misc	Labridae	Bodianinae	Choerodon	Choerodon schoenleinii	species	3.38	0.23	benthic	species	nonguarders	genus	egg scatterers	genus	1.47955
LF025e	wild	Singapore Strait	Pulau Tekukor	NA	21.21	Acanthuriformes	Siganidae		Siganus	Siganus canaliculatus	species	2.76	0.23	benthic	species	nonguarders	species	egg scatterers	species	2.27662
LF027e	wild	Johor Strait	Changi Beach	566	28	Perciformes/Serranoidei	Serranidae	Epinephelinae	Epinephelus	Epinephelus coioides	species	4.04	0.27	benthic	species	nonguarders	species	egg scatterers	species	1.28418
LF028e	wild	Singapore Strait	southern island	NA	35	Perciformes/Serranoidei	Serranidae	Epinephelinae	Epinephelus	Epinephelus coioides	species	4.04	0.27	benthic	species	nonguarders	species	egg scatterers	species	1.28418
LF029e	wild	Singapore Strait	southern island	1535	36	Eupercaria/misc	Labridae	Bodianinae	Choerodon	Choerodon schoenleinii	species	3.38	0.23	benthic	species	nonguarders	genus	egg scatterers	genus	1.47955
LF030e	wild	Johor Strait	Changi Beach	1049	34	Perciformes/Serranoidei	Serranidae	Epinephelinae	Epinephelus	Epinephelus coioides	species	4.04	0.27	benthic	species	nonguarders	species	egg scatterers	species	1.28418
LF033e	wild	Johor Strait	Changi Beach	106	15	Perciformes/Serranoidei	Serranidae	Epinephelinae	Cephalopholis	Cephalopholis boenak	species	4.07	0.25	pelagic	species	nonguarders	species	egg scatterers	species	1.38967
LF035e	wild	Singapore Strait	southern island	523.66	25.5	Eupercaria/misc	Labridae	Bodianinae	Choerodon	Choerodon schoenleinii	species	3.38	0.23	benthic	species	nonguarders	genus	egg scatterers	genus	1.47955
LF036e	wild	Singapore Strait	Pulau Tekukor	189.87	19.5	Acanthuriformes	Siganidae		Siganus	Siganus canaliculatus	species	2.76	0.23	benthic	species	nonguarders	species	egg scatterers	species	2.27662
LF038e	wild	Singapore Strait	Pulau Tekukor	131.37	26.5	Siluriformes	Plotosidae		Paraplotosus	Paraplotosus albilabris	species	3.44	0.27	benthic	species	guarders	family	nesters	family	NA
LF039e	wild	Singapore Strait	Pulau Tekukor	287.79	12.3	Acanthuriformes	Siganidae		Siganus	Siganus javus	species	2.39	0.24	pelagic	species	nonguarders	species	egg scatterers	species	2.31186
LF060e	farmed	Johor Strait	Farm A	800.7	35.5	Carangaria/misc	Latidae		Lates	Lates calcarifer	species	3.83	0.29	benthic	species	nonguarders	species	egg scatterers	species	1.0615
LF061e	farmed	Johor Strait	Farm A	722	34	Carangaria/misc	Latidae		Lates	Lates calcarifer	species	3.83	0.29	benthic	species	nonguarders	species	egg scatterers	species	1.0615
LF062e	farmed	Johor Strait	Farm A	762.4	34	Carangaria/misc	Latidae		Lates	Lates calcarifer	species	3.83	0.29	benthic	species	nonguarders	species	egg scatterers	species	1.0615
LF063e	farmed	Johor Strait	Farm A	625.4	27.5	Carangiformes	Carangidae	Trachinotinae	Trachinotus	Trachinotus sp	genus	3.69	0.28	benthic	genus	nonguarders	genus	egg scatterers	genus	NA
LF113e	farmed	Johor Strait	Farm G	844.2	34.5	Carangaria/misc	Latidae		Lates	Lates calcarifer	species	3.83	0.29	benthic	species	nonguarders	species	egg scatterers	species	1.0615
LF114e	farmed	Johor Strait	Farm G	711.8	33.5	Carangaria/misc	Latidae		Lates	Lates calcarifer	species	3.83	0.29	benthic	species	nonguarders	species	egg scatterers	species	1.0615
LF115e	farmed	Johor Strait	Farm G	739.6	33	Carangaria/misc	Latidae		Lates	Lates calcarifer	species	3.83	0.29	benthic	species	nonguarders	species	egg scatterers	species	1.0615
LF116e	farmed	Johor Strait	Farm G	894.2	34.5	Carangaria/misc	Latidae		Lates	Lates calcarifer	species	3.83	0.29	benthic	species	nonguarders	species	egg scatterers	species	1.0615
LF117e	farmed	Johor Strait	Farm G	916.8	37	Carangaria/misc	Latidae		Lates	Lates calcarifer	species	3.83	0.29	benthic	species	nonguarders	species	egg scatterers	species	1.0615
LF118e	farmed	Johor Strait	Farm G	852	35	Carangaria/misc	Latidae		Lates	Lates calcarifer	species	3.83	0.29	benthic	species	nonguarders	species	egg scatterers	species	1.0615
LF140e	farmed	Johor Strait	Farm G	884	34.5	Eupercaria/misc	Lutjanidae	Lutjaninae	Lutjanus	Lutjanus malabaricus	species	4.48	0.25	pelagic	species	nonguarders	species	egg scatterers	species	1.47323
LF145e	farmed	Johor Strait	Farm G	899.7	34	Eupercaria/misc	Lutjanidae	Lutjaninae	Lutjanus	Lutjanus malabaricus	species	4.48	0.25	pelagic	species	nonguarders	species	egg scatterers	species	1.47323
LF148e	farmed	varies	Farm F	825.9	35	Carangaria/misc	Latidae		Lates	Lates calcarifer	species	3.83	0.29	benthic	species	nonguarders	species	egg scatterers	species	1.0615
LF149e	farmed	varies	Farm F	899.7	37.5	Carangaria/misc	Latidae		Lates	Lates calcarifer	species	3.83	0.29	benthic	species	nonguarders	species	egg scatterers	species	1.0615
LF157e	wild	Johor Strait	Pulau Ubin mangrove	1793.9	49	Carangaria/misc	Latidae		Lates	Lates calcarifer	species	3.83	0.29	benthic	species	nonguarders	species	egg scatterers	species	1.0615
LF189e	wild	Johor Strait	Pasir Ris	994.1	38	Carangaria/misc	Latidae		Lates	Lates calcarifer	species	3.83	0.29	benthic	species	nonguarders	species	egg scatterers	species	1.0615
LF195e	farmed	varies	Farm F	606.1	33	Carangaria/misc	Latidae		Lates	Lates calcarifer	species	3.83	0.29	benthic	species	nonguarders	species	egg scatterers	species	1.0615
LF196e	farmed	varies	Farm F	629.4	34	Carangaria/misc	Latidae		Lates	Lates calcarifer	species	3.83	0.29	benthic	species	nonguarders	species	egg scatterers	species	1.0615
LF199e	farmed	varies	Farm F	668	33	Carangaria/misc	Latidae		Lates	Lates calcarifer	species	3.83	0.29	benthic	species	nonguarders	species	egg scatterers	species	1.0615
LF202e	farmed	varies	Farm F	612.1	33	Carangaria/misc	Latidae		Lates	Lates calcarifer	species	3.83	0.29	benthic	species	nonguarders	species	egg scatterers	species	1.0615
LF203e	farmed	varies	Farm F	670.5	33	Carangaria/misc	Latidae		Lates	Lates calcarifer	species	3.83	0.29	benthic	species	nonguarders	species	egg scatterers	species	1.0615
LF215e	wild	Johor Strait	Pulau Ubin mangrove	1122.8	38.5	Carangaria/misc	Latidae		Lates	Lates calcarifer	species	3.83	0.29	benthic	species	nonguarders	species	egg scatterers	species	1.0615
LF226e	farmed	Johor Strait	Farm G	881.5	33	Eupercaria/misc	Lutjanidae	Lutjaninae	Lutjanus	Lutjanus malabaricus	species	4.48	0.25	pelagic	species	nonguarders	species	egg scatterers	species	1.47323
LF227e	farmed	Johor Strait	Farm G	1015.4	33	Eupercaria/misc	Lutjanidae	Lutjaninae	Lutjanus	Lutjanus malabaricus	species	4.48	0.25	pelagic	species	nonguarders	species	egg scatterers	species	1.47323
LF228e	farmed	Johor Strait	Farm G	912.6	33	Eupercaria/misc	Lutjanidae	Lutjaninae	Lutjanus	Lutjanus malabaricus	species	4.48	0.25	pelagic	species	nonguarders	species	egg scatterers	species	1.47323
LF229e	farmed	Johor Strait	Farm G	906.3	33	Eupercaria/misc	Lutjanidae	Lutjaninae	Lutjanus	Lutjanus malabaricus	species	4.48	0.25	pelagic	species	nonguarders	species	egg scatterers	species	1.47323
LF233e	farmed	Johor Strait	Farm G	751.1	33	Carangaria/misc	Latidae		Lates	Lates calcarifer	species	3.83	0.29	benthic	species	nonguarders	species	egg scatterers	species	1.0615
LF234e	farmed	Johor Strait	Farm G	662.6	32	Carangaria/misc	Latidae		Lates	Lates calcarifer	species	3.83	0.29	benthic	species	nonguarders	species	egg scatterers	species	1.0615
LF235e	farmed	Johor Strait	Farm G	652.8	32.5	Carangaria/misc	Latidae		Lates	Lates calcarifer	species	3.83	0.29	benthic	species	nonguarders	species	egg scatterers	species	1.0615
LF237e	farmed	Johor Strait	Farm G	694.6	31.5	Carangaria/misc	Latidae		Lates	Lates calcarifer	species	3.83	0.29	benthic	species	nonguarders	species	egg scatterers	species	1.0615
LF238e	farmed	Johor Strait	Farm G	617.8	31.5	Carangaria/misc	Latidae		Lates	Lates calcarifer	species	3.83	0.29	benthic	species	nonguarders	species	egg scatterers	species	1.0615
LF240e	wild	Johor Strait	Pulau Ubin mangrove	411.5	27.7	Carangaria/misc	Latidae		Lates	Lates calcarifer	species	3.83	0.29	benthic	species	nonguarders	species	egg scatterers	species	1.0615
LF242e	farmed	Singapore Strait	Farm B	663.1	31	Carangaria/misc	Latidae		Lates	Lates calcarifer	species	3.83	0.29	benthic	species	nonguarders	species	egg scatterers	species	1.0615
LF247e	farmed	Singapore Strait	Farm B	818.4	34	Carangaria/misc	Latidae		Lates	Lates calcarifer	species	3.83	0.29	benthic	species	nonguarders	species	egg scatterers	species	1.0615
LF252e	farmed	Johor Strait	Farm D	825.7	33.5	Carangaria/misc	Latidae		Lates	Lates calcarifer	species	3.83	0.29	benthic	species	nonguarders	species	egg scatterers	species	1.0615
LF253e	farmed	Johor Strait	Farm D	778.7	33.5	Carangaria/misc	Latidae		Lates	Lates calcarifer	species	3.83	0.29	benthic	species	nonguarders	species	egg scatterers	species	1.0615
LF254e	farmed	Johor Strait	Farm D	564.2	29	Eupercaria/misc	Lutjanidae	Lutjaninae	Lutjanus	Lutjanus malabaricus	species	4.48	0.25	pelagic	species	nonguarders	species	egg scatterers	species	1.47323
LF256e	farmed	Johor Strait	Farm D	614.7	28.5	Eupercaria/misc	Lutjanidae	Lutjaninae	Lutjanus	Lutjanus malabaricus	species	4.48	0.25	pelagic	species	nonguarders	species	egg scatterers	species	1.47323
LF258e	farmed	Johor Strait	Farm D	530.9	25.5	Carangiformes	Carangidae	Trachinotinae	Trachinotus	Trachinotus sp	genus	3.69	0.28	benthic	genus	nonguarders	genus	egg scatterers	genus	NA
LF259e	farmed	Johor Strait	Farm D	508.4	25.5	Carangiformes	Carangidae	Trachinotinae	Trachinotus	Trachinotus sp	genus	3.69	0.28	benthic	genus	nonguarders	genus	egg scatterers	genus	NA
LF260e	farmed	Johor Strait	Farm D	501.4	25	Carangiformes	Carangidae	Trachinotinae	Trachinotus	Trachinotus sp	genus	3.69	0.28	benthic	genus	nonguarders	genus	egg scatterers	genus	NA
LF265e	farmed	Johor Strait	Farm D	823.7	33	Carangaria/misc	Latidae		Lates	Lates calcarifer	species	3.83	0.29	benthic	species	nonguarders	species	egg scatterers	species	1.0615
LF266e	farmed	Johor Strait	Farm D	937	34.5	Carangaria/misc	Latidae		Lates	Lates calcarifer	species	3.83	0.29	benthic	species	nonguarders	species	egg scatterers	species	1.0615
LF267e	farmed	Johor Strait	Farm D	952.3	34.5	Carangaria/misc	Latidae		Lates	Lates calcarifer	species	3.83	0.29	benthic	species	nonguarders	species	egg scatterers	species	1.0615
LF268e	farmed	Johor Strait	Farm E	633.9	32.5	Gonorynchiformes	Chanidae		Chanos	Chanos chanos	species	2.4	0.24	pelagic	species	nonguarders	species	egg scatterers	species	3.58577
LF269e	farmed	Johor Strait	Farm E	570.9	31	Gonorynchiformes	Chanidae		Chanos	Chanos chanos	species	2.4	0.24	pelagic	species	nonguarders	species	egg scatterers	species	3.58577
LF270e	farmed	Johor Strait	Farm E	555.1	31.5	Gonorynchiformes	Chanidae		Chanos	Chanos chanos	species	2.4	0.24	pelagic	species	nonguarders	species	egg scatterers	species	3.58577
LF275e	farmed	Johor Strait	Farm D	972.3	33.5	Carangaria/misc	Latidae		Lates	Lates calcarifer	species	3.83	0.29	benthic	species	nonguarders	species	egg scatterers	species	1.0615
LF277e	farmed	Johor Strait	Farm D	823.3	34.5	Carangaria/misc	Latidae		Lates	Lates calcarifer	species	3.83	0.29	benthic	species	nonguarders	species	egg scatterers	species	1.0615
LF278e	farmed	Johor Strait	Farm D	716.2	32.5	Carangaria/misc	Latidae		Lates	Lates calcarifer	species	3.83	0.29	benthic	species	nonguarders	species	egg scatterers	species	1.0615
LF279e	farmed	Johor Strait	Farm D	889	34.5	Carangaria/misc	Latidae		Lates	Lates calcarifer	species	3.83	0.29	benthic	species	nonguarders	species	egg scatterers	species	1.0615
